# Supplementary material
Source: PubMed Central journal article supplement (PMC7530061)
Supplement: NIHMS1615707-supplement-Supplemental_Material.pdf [file NIHMS1615707-supplement-Supplemental_Material.pdf]

## SUPPLEMENTAL MATERIALS

For

### **BAF60a Deficiency in Vascular Smooth Muscle Cells Prevents Abdominal Aortic Aneurysm by Reducing Inflammation and Extracellular Matrix Degradation**

**Authors:** Ziyi Chang\*, Guizhen Zhao\*, Yang Zhao\*, Haocheng Lu, Wenhao Xiong, Wenying Liang, Jinjian Sun, Huilun Wang, Tianqing Zhu, Oren Rom, Yanhong Guo, Yanbo Fan, Lin Chang, Bo Yang, Minerva T. Garcia-Barrio, Jiandie D. Lin, Y. Eugene Chen, Jifeng Zhang

**Affiliations:** Frankel Cardiovascular Center, Department of Internal Medicine, University of Michigan Medical Center, Ann Arbor, MI 48109 (Z.C., G.Z., Y.Z., H.L., W.X., W.L., J.S., H.W., T.Z., O.R., Y.G., Y.F., L.C., M.G.B., Y.E.C., J.Z.); Department of Metabolism and Endocrinology, The Second Xiangya Hospital, Central South University, Changsha, 410011, Hunan, P. R. China (Z.C.); Department of Cardiovascular Medicine, the Second Xiangya Hospital, Central South University, Changsha, 410011, Hunan, China (J.S.); Department of Cardiac Surgery, University of Michigan Medical Center, Ann Arbor, MI 48109 (B.Y.); Life Sciences Institute and Department of Cell & Developmental Biology, University of Michigan, Ann Arbor, MI 48109 (J.D.L.).

Z.C., G.Z., and Y.Z. contributed equally to this work.

**Corresponding Authors:** Jifeng Zhang, Ph.D., Department of Internal Medicine, Cardiovascular Center, University of Michigan Medical Center, 2800 Plymouth Road, Ann Arbor, MI 48109, e-mail: [jifengz@umich.edu](mailto:jifengz@umich.edu)

#### **Contents:**

Supplemental Methods (page 1-2)

Supplemental Figures I through XIII and Figure Legends (page 3-18)

Supplemental Table I through VIII (page 19-40)

Major Resources Table (page 41-43)

## **Supplemental Methods**

### **Protein Extraction and Western Blotting**

Cell extracts were prepared in RIPA lysis buffer, human and mouse tissues were homogenized in T-PER™ tissue protein extraction reagent (ThermoFisher Scientific, #78510). Nuclear and cytoplasmic proteins were extracted using NE-PER™ Nuclear and Cytoplasmic Extraction Reagents (ThermoFisher Scientific, #78835) following the manufacturer's protocol. Protein extracts were resolved in SDS-PAGE gels and transferred to nitrocellulose membranes. Membranes were blocked and then incubated with primary antibodies and IRDye secondary antibodies before being scanned with the Odyssey CLx Imaging System (LI-COR Bioscience, Lincoln, NE).

### **siRNA mediated BAF60a knockdown**

Human aortic smooth muscle cells (HASMCs) were transfected with 30 nM siBAF60a (ThermoFisher Scientific, #s13151) or non-targeting siRNA (ThermoFisher Scientific, #4390843) using Lipofectamine RNAiMAX Reagent (Invitrogen, #13778150) following the manufacturer's instructions.

### **Adenovirus-mediated BAF60a overexpression**

Adenovirus encoding human BAF60a (AdBAF60a) and GFP (AdGFP) were used in the gain of function experiments in this study by infecting HASMCs with 20 multiplicity of infection (MOI) for 48 hours.

### **mRNA Isolation and Quantitative Real-time PCR Analysis**

Total RNA was extracted using TRIzol Reagent (Invitrogen, #15596018) and purified using RNeasy Mini Kit (QIAGEN, #74106, Hilden, Germany). SuperScript™ III First-Strand Synthesis System (Invitrogen, #18080051) and random primers were used to reverse-transcribe RNA into cDNA. Gene expression was quantified in triplicates by quantitative real-time PCR (qPCR) using IQ SYBR Green Supermix (Bio-Rad, #1708882). qPCR primer sequences are listed in Supplemental Table V.

### **Co-Immunoprecipitation**

VSMCs were lysed with Pierce IP Lysis Buffer (ThermoScientific, #87788) and incubated with primary antibody against p300 or normal rabbit IgG at 4°C overnight with rotation. The immunocomplexes were then precipitated with Protein A Magnetic Beads (CST, # 73778) and eluted for Western blot analysis.

### **Immunofluorescence Staining of Cultured Cells**

Cells were cultured in Chambered Cell Culture Slides (Fisher, #08774208), fixed, blocked, and then incubated with primary antibodies against p65, followed by Alexa Fluor conjugated secondary antibody (Jackson ImmunoResearch Laboratories). Nuclei were stained with DAPI (Invitrogen, #P36935).

## **ELISA**

ELISA was performed to measure the concentration of MCP-1 (R&D, #DCP00) and Cathepsin S (Abcam, #ab155427) in HASMCs culture supernatants following the manufacturer's instructions.

## **Macrophage Migration Assay**

Macrophage migration assay was performed using 8.0µm transwell plates (Sigma-Aldrich #CLS3464). Briefly, HASMCs were transfected with 30 nM siBAF60a or siControl, or infected with 20MOI of AdBAF60a or AdGFP. After 48h, the cell culture medium was changed to fresh Opti-MEM I (Gibco #31985-070) with or without TNFα (20ng/ml). The medium was changed again to fresh Opti-MEM I 4 hours later and incubated for another 20 hours. The conditioned medium was collected and added to the lower chambers of the transwell plates while  $2 \times 10^5$  RAW 264.7 cells starved overnight were seeded in the upper chambers. Six hours later, cells on the upper surface of the transwell insert were removed by gently scraping with a cotton swab, and the membranes were fixed and stained with 0.1% crystal violet (Sigma-Aldrich, #C0775). Images of 4 random fields per transwell were taken by microscopy and the numbers of migrated cells were determined using ImageJ software.

## **Generation of Stable Cell Lines**

EcoPack2-293 cells were transfected with 20µg pMSCV-BAF60a-BirA\* or pMSCV-BirA\* vectors. The supernatant was collected at 24, 48 and 72 hours after transfection, and was filtered before addition to A7r5 cells. Stable transfectant selection with puromycin (Sigma-Aldrich, #P7255) started at 24 hours after infection. Upon colony formation, subclones were isolated and screened by immunofluorescence with antibodies against BAF60a and streptavidin.

## Online Figures

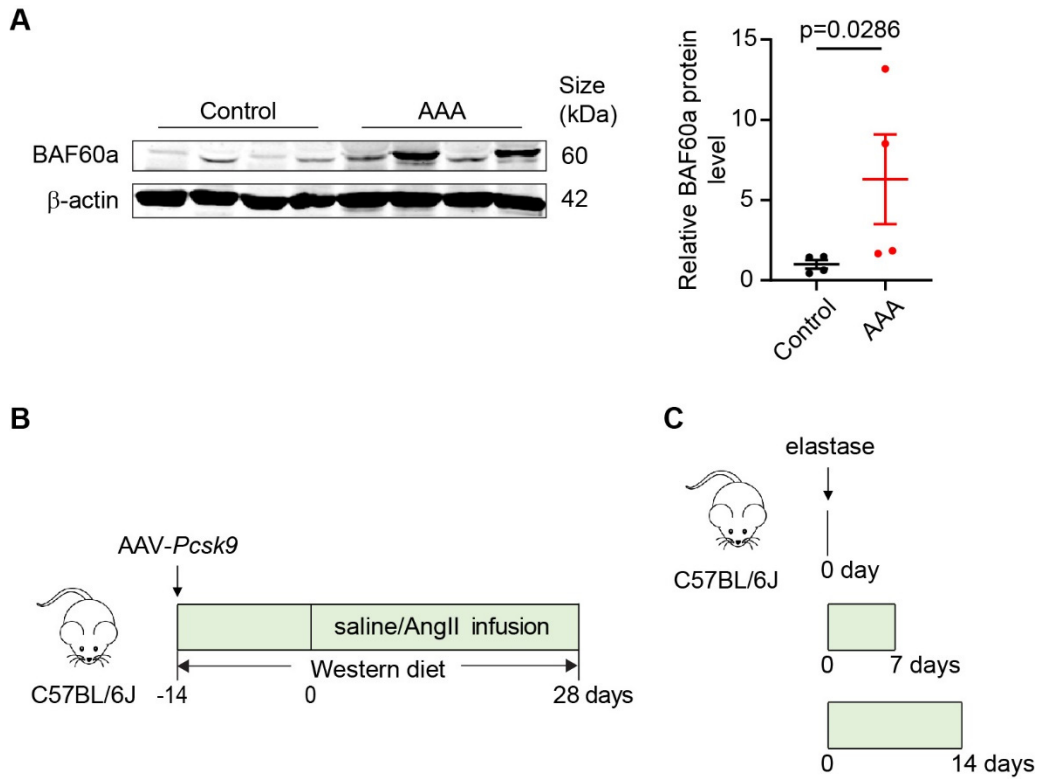

**Supplemental Figure I. BAF60a expression is upregulated in human and murine AAA lesions.** **A**, BAF60a protein abundance was determined by Western blotting in human AAA samples (n=4) and healthy control abdominal aortas (n=4). **B**, Schematic diagram of saline and AngII infusion in AngII-induced AAA model in C57BL/6J mice. **C**, Schematic diagram of elastase treatment for 0, 7, or 14 days in C57BL/6J mice. Data are presented as mean $\pm$ SEM. Nonparametric Mann-Whitney test for A.

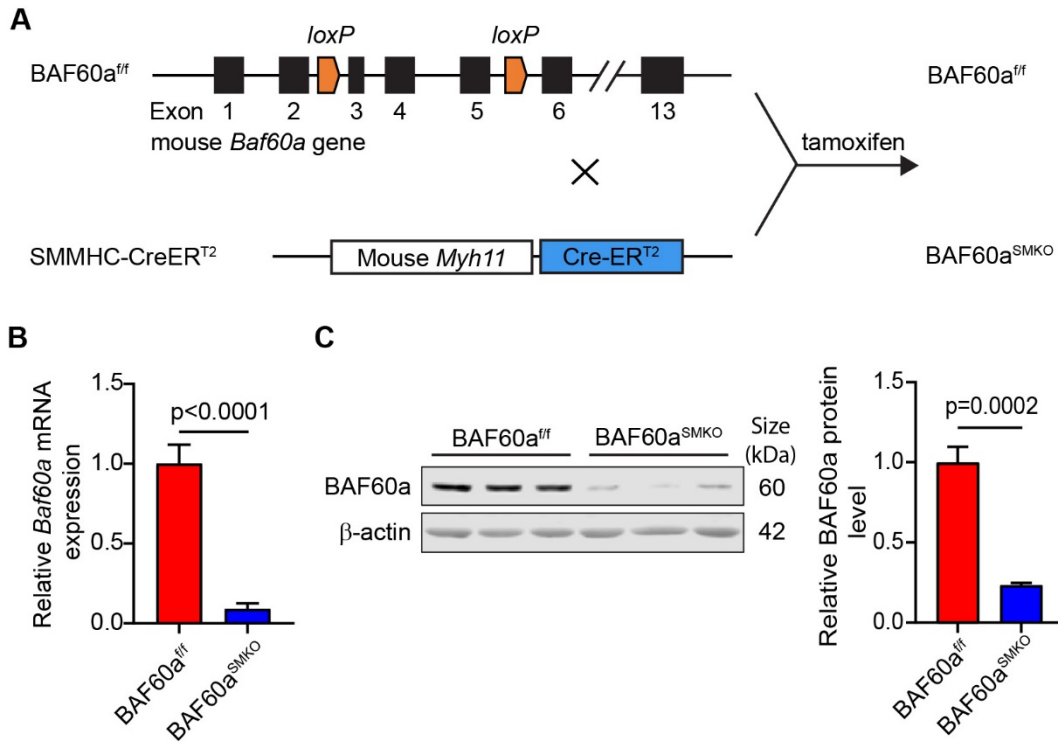

**Supplemental Figure II. Generation of vascular smooth muscle cells (VSMCs) specific BAF60a conditional knockout mice.** **A**, Schematic of gene targeting strategy to generate VSMC-specific BAF60a knockout mice (BAF60a<sup>SMKO</sup>); tamoxifen was given consecutively for 5 days (80 mg/kg/day, i.p.). **B-C**, Relative BAF60a mRNA and protein levels were determined by qPCR (**B**) (n=5 for each group) and Western blot (**C**) (n=4 for each group) in aortas of BAF60a<sup>ff</sup> and BAF60a<sup>SMKO</sup> mice. Data are presented as mean±SEM. Student's t-test for B and C.

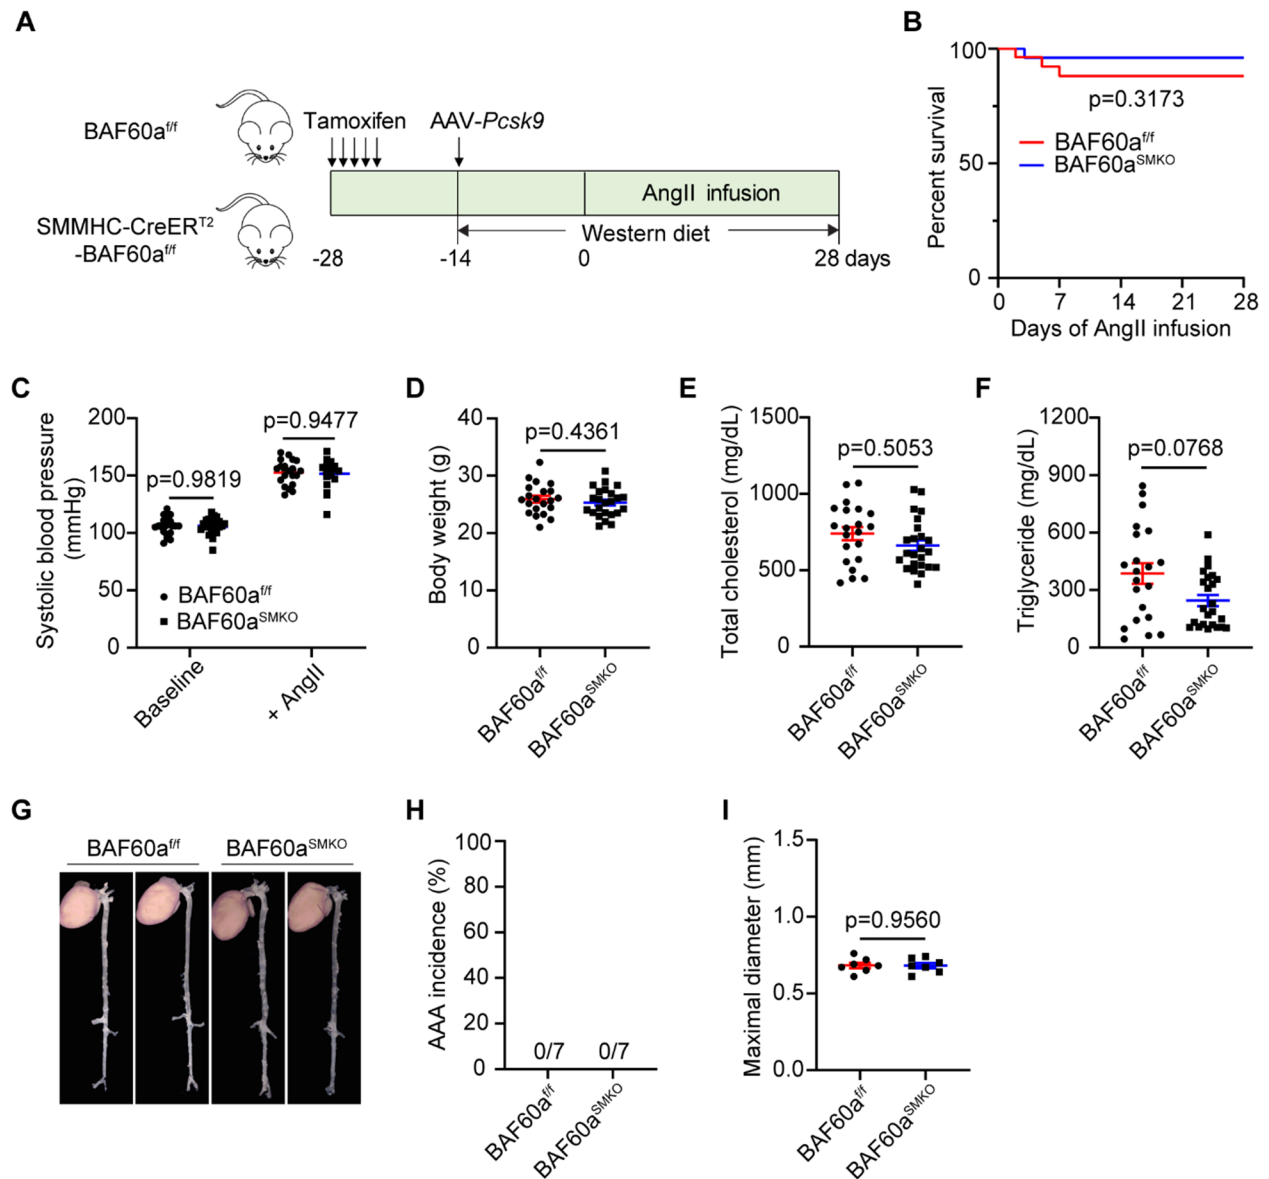

**Supplemental Figure III. Experimental parameters of the AngII-induced AAA model in BAF60a<sup>fl/fl</sup> and BAF60a<sup>SMKO</sup> mice.** **A-F**, Eight to 10 weeks old male BAF60a<sup>fl/fl</sup> (n=24) and BAF60a<sup>SMKO</sup> (n=25) mice were given AAV-Pcsk9 (i.p.) and Western diet to induce hypercholesterolemia followed by AngII (1,500 ng/kg/min) infusion with minipumps for 28 days. **A**, Schematic diagram indicating the process of murine AngII-induced AAA model. **B**, Survival rates indicated by Kaplan-Meier curves. **C**, Systolic blood pressure before and 28 days after AngII minipump implantation. **D-F**, Body weight (**D**), serum total cholesterol (**E**) and triglyceride levels (**F**) of BAF60a<sup>fl/fl</sup> and BAF60a<sup>SMKO</sup> mice infused with AngII for 28 days. **G-I**, Eight to 10 weeks old male BAF60a<sup>fl/fl</sup> (n=7) and BAF60a<sup>SMKO</sup> mice (n=7) were subjected to sham treatment and euthanized 28 days after surgery. **G**, Representative morphology of aortas. **H**, Incidence of AAA. **I**, Quantification of maximal external diameters of suprarenal abdominal aortas. Data are presented as mean±SEM. Mantel-Cox test for B, two-way ANOVA followed by Holm-Sidak analysis for C, and Student's t-test for D-E and I, nonparametric Mann-Whitney test for F.

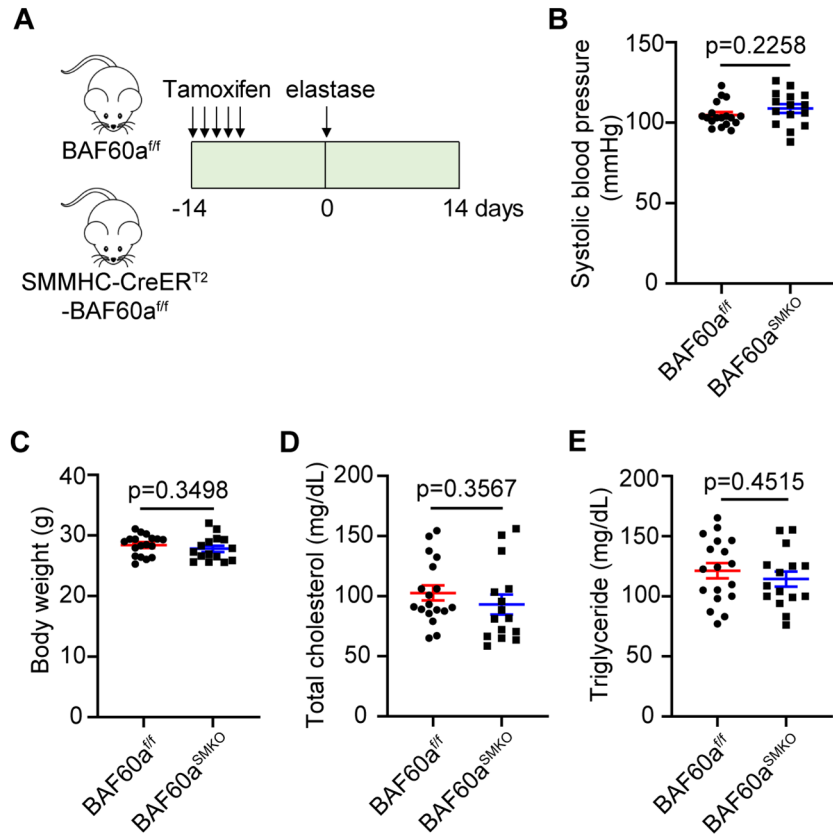

**Supplemental Figure IV. Experimental parameters of the elastase-treated BAF60a<sup>ff</sup> and BAF60a<sup>SMKO</sup> mice.** Ten to 12 weeks old male BAF60a<sup>ff</sup> and BAF60a<sup>SMKO</sup> mice were subjected to elastase-induced AAA by the treatment of the infrarenal abdominal aortas with 30  $\mu$ L elastase for 30 min as described in the Supplemental Methods and euthanized 14 days after elastase exposure. **A**, Schematic diagram for the elastase-induced AAA model in BAF60a<sup>ff</sup> (n=18) and BAF60a<sup>SMKO</sup> (n=15) mice. **B-E**, Systolic blood pressure (**B**), body weight (**C**), serum total cholesterol (**D**) and triglyceride levels (**E**) in BAF60a<sup>ff</sup> and BAF60a<sup>SMKO</sup> mice. Data are presented as mean  $\pm$  SEM. Student's t-test for B-E.

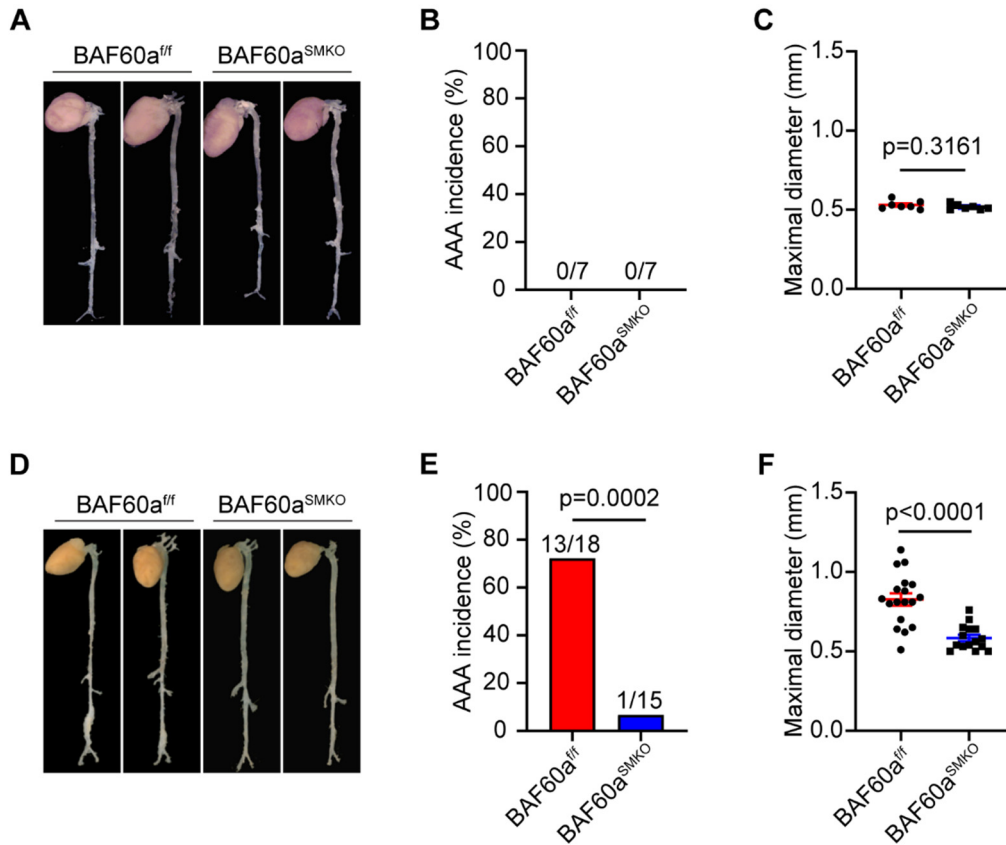

**Supplemental Figure V. BAF60a depletion in VSMCs attenuates elastase-induced AAA in mice.** **A-C**, Ten to 12 weeks old male BAF60a<sup>fl/fl</sup> (n=7) and BAF60a<sup>SMKO</sup> (n=7) mice were treated with heat-inactivated elastase to serve as the sham control and euthanized 14 days after surgery. **A**, Representative morphology of aortas. **B**, Incidence of AAA. **C**, Quantification of maximal external diameters of suprarenal abdominal aortas. **D-F**, In the elastase-induced AAA model, 10 to 12 weeks old male BAF60a<sup>fl/fl</sup> (n=18) and BAF60a<sup>SMKO</sup> (n=15) mice were treated with active elastase and euthanized 14 days after elastase exposure. **D**, Representative morphology of aortas. **E**, Incidence of AAA. **F**, Quantification of maximal external diameter of infrarenal abdominal aortas. Data are presented as mean±SEM. Student's t-test for C. Chi-squared test for E, Mann-Whitney test for F.



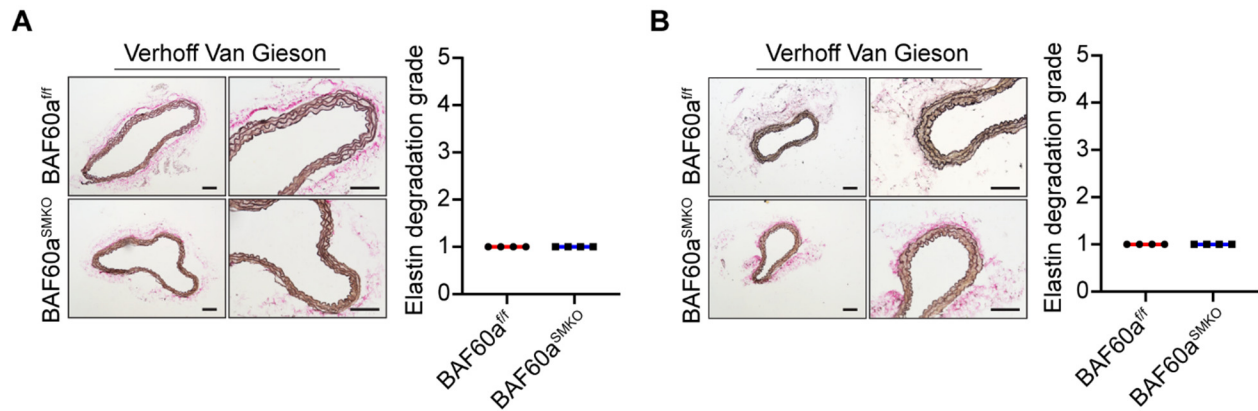

**Supplemental Figure VI. BAF60a deficiency in VSMCs cannot induce aortic ECM degradation in sham control mice in both AAA models. A**, Representative images of Verhoff Van Gieson staining and quantification analysis of elastin fragmentation in suprarenal abdominal aortic sections from BAF60a<sup>fl/fl</sup> (n=4) and BAF60a<sup>SMKO</sup> (n=4) mice 28 days after sham treatment in the AngII-induced AAA model. Scale bar=100  $\mu$ m. **B**, Representative images of Verhoff Van Gieson staining and quantification analysis of elastin fragmentation in infrarenal abdominal aortic sections from BAF60a<sup>fl/fl</sup> (n=4) and BAF60a<sup>SMKO</sup> (n=4) mice 14 days after heat-inactivated elastase exposure in the elastase-induced AAA model. Scale bar=100  $\mu$ m.

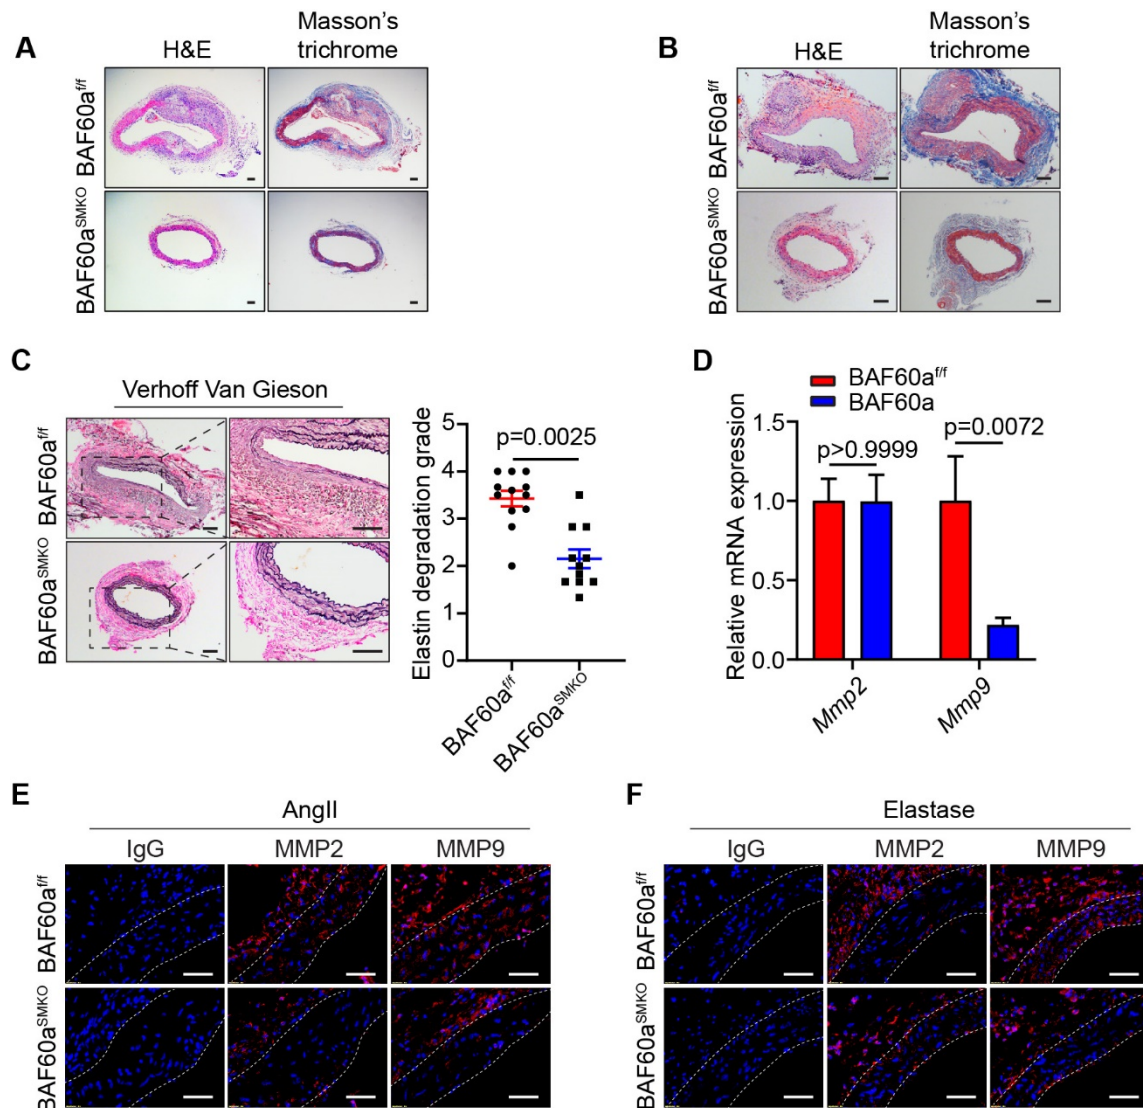

**Supplemental Figure VII. BAF60a deficiency in VSMCs reduces ECM degradation in AAA lesion.** **A**, Representative images of hematoxylin and eosin (H&E) and Masson's trichrome staining of the suprarenal abdominal aortic sections from BAF60a<sup>ff</sup> and BAF60a<sup>SMKO</sup> mice after 28 days of AngII infusion. Scale bar=100  $\mu$ m. **B**, Representative images of H&E and Masson's trichrome staining of the infrarenal abdominal aortic sections from BAF60a<sup>ff</sup> and BAF60a<sup>SMKO</sup> mice 14 days after elastase exposure. Scale bar=100  $\mu$ m. **C**, Representative images of Verhoff Van Gieson staining and quantification analysis of elastin fragmentation in infrarenal abdominal aortic sections from BAF60a<sup>ff</sup> (n=12) and BAF60a<sup>SMKO</sup> (n=11) mice 14 days after elastase treatment. Scale bar=100  $\mu$ m for whole aortic sections. **D**, Relative MMP2 and MMP9 mRNA and levels were determined by qPCR in the aortic media of BAF60a<sup>ff</sup> (n=5) and BAF60a<sup>SMKO</sup> (n=5) mice 28 days after AngII infusion. **E-F**, Representative immunofluorescence staining of MMP2 and MMP9 (red) in abdominal aortic sections from BAF60a<sup>ff</sup> and BAF60a<sup>SMKO</sup> mice subjected to AngII- (**E**) or elastase- (**F**) induced AAA model. Nuclei stained by DAPI were indicated in blue. Dotted lines depict aortic media. Lumen area is on the bottom right corner in

all pictures. Scale bar=50  $\mu\text{m}$ . n=3 for each group. Data are presented as mean $\pm$ SEM. Student's t-test for C, one-way ANOVA followed by Tukey's post hoc analysis for D.

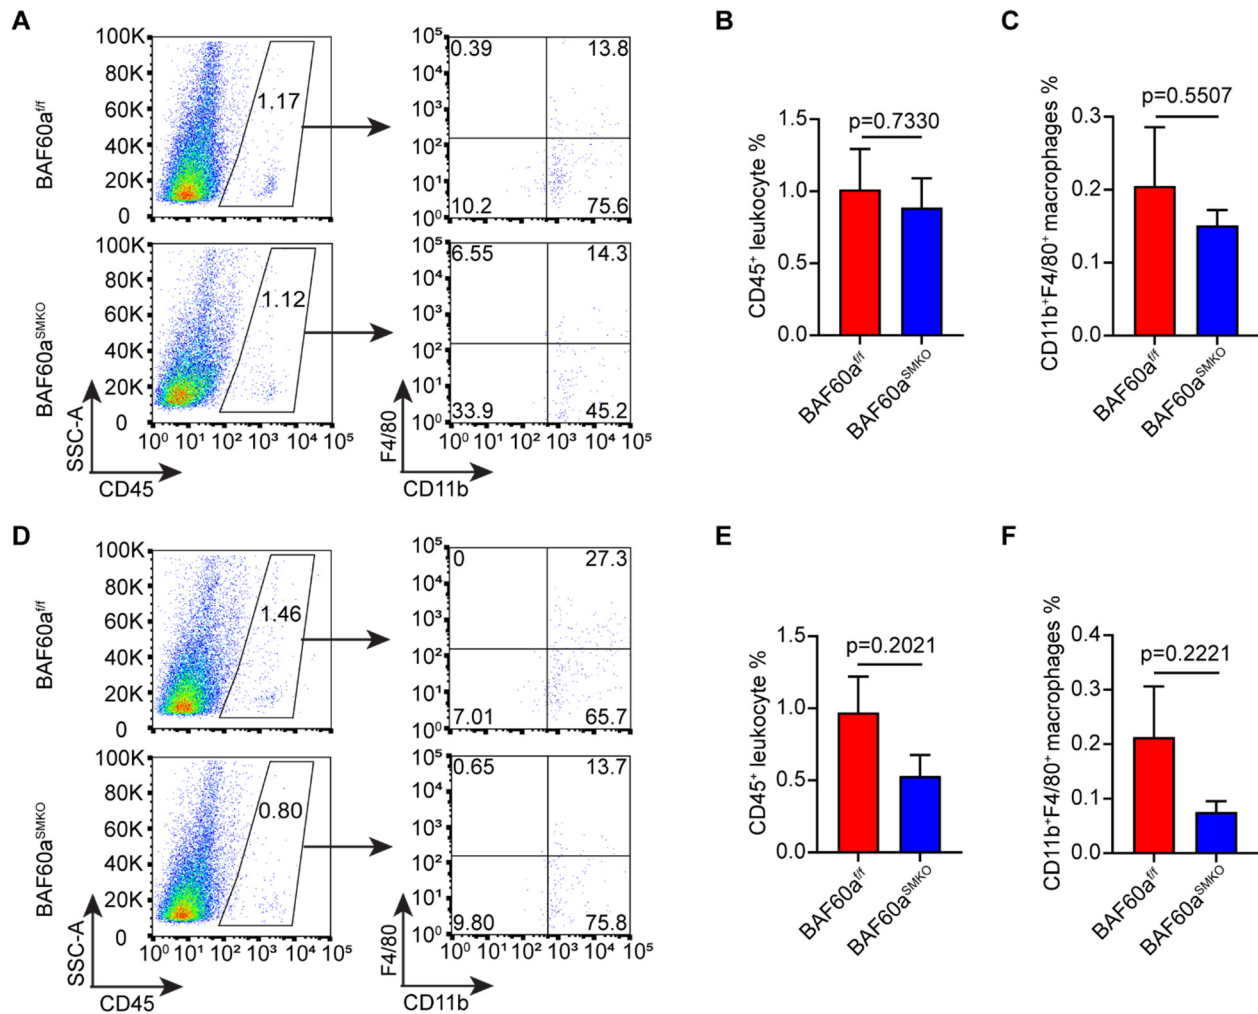

**Supplemental Figure VIII. BAF60a deficiency in VSMCs does not alter the proportion of immune cells in the abdominal aorta in sham control mice.** **A-C**, Single cells were isolated from suprarenal abdominal aortas of BAF60a<sup>fl/fl</sup> (n=3) and BAF60a<sup>SMKO</sup> (n=3) mice 28 days after sham treatment in the AngII-induced AAA model and flow cytometry analysis was performed. **A**, Representative dot plots showing the gating strategy to obtain the macrophage population (CD11b<sup>+</sup>F4/80<sup>+</sup>) from gated CD45<sup>+</sup> leukocytes. **B**, Quantitative analysis of the percentage of CD45<sup>+</sup> leukocytes. **C**, Quantitative analysis of the percentage of CD11b<sup>+</sup>F4/80<sup>+</sup> macrophages. **D-F**, Single cells were isolated from infrarenal abdominal aortas of BAF60a<sup>fl/fl</sup> (n=3) and BAF60a<sup>SMKO</sup> (n=3) mice 14 days after heat-inactivated elastase exposure in the elastase-induced AAA model and flow cytometry analysis was performed. **D**, Representative dot plots showing the gating strategy to obtain the macrophage population (CD11b<sup>+</sup>F4/80<sup>+</sup>) from gated CD45<sup>+</sup> leukocytes. **E**, Quantitative analysis of the percentage of CD45<sup>+</sup> leukocytes. **F**, Quantitative analysis of the percentage of CD11b<sup>+</sup>F4/80<sup>+</sup> macrophages. Data are presented as mean±SEM. Student's t-test for B-C and E-F.

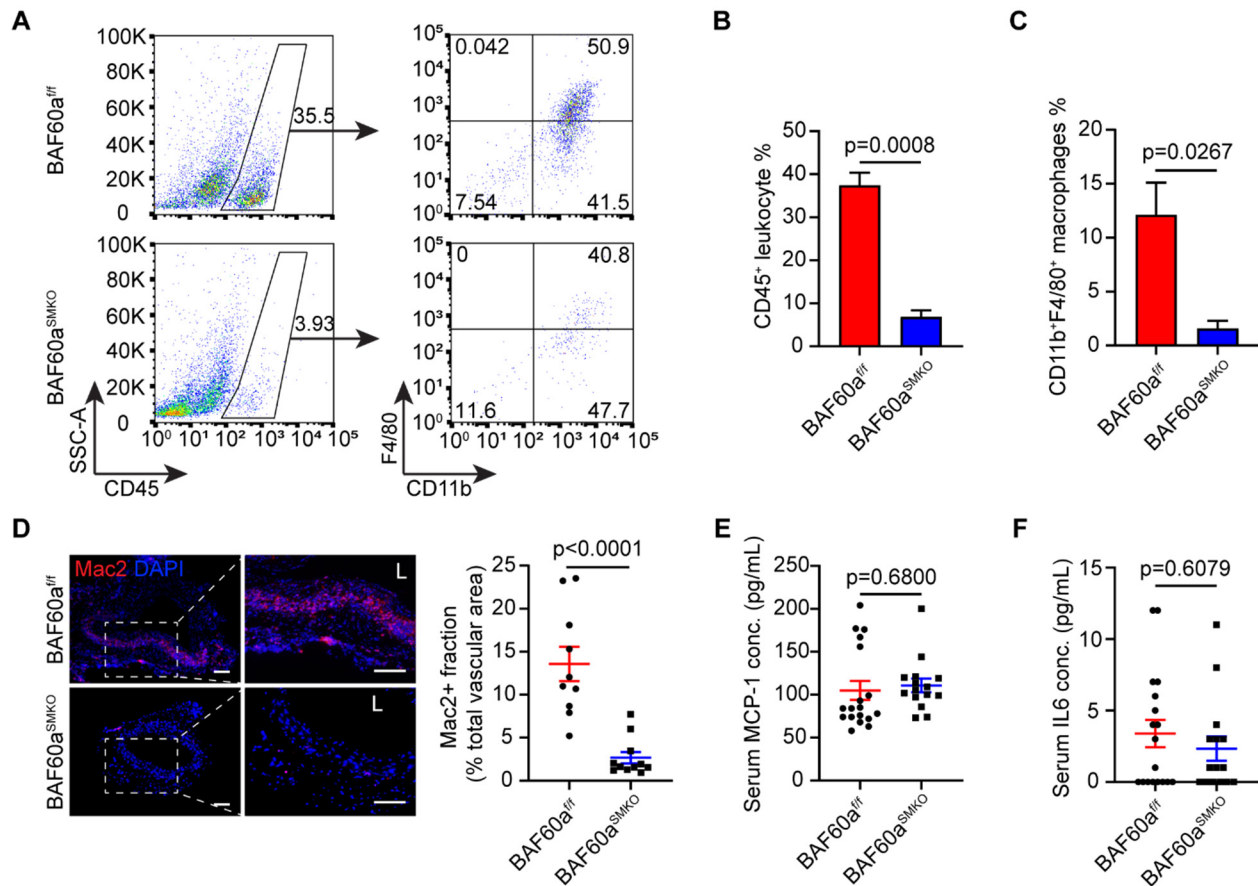

### Supplemental Figure IX. BAF60a deficiency in VSMCs suppresses inflammatory

**response in the elastase-induced AAA lesion.** In the elastase-induced AAA model, 10 to 12 weeks old male BAF60a<sup>ff</sup> (n=18) and BAF60a<sup>SMKO</sup> (n=15) mice were treated with elastase and euthanized 14 days after elastase exposure. **A-C**, Single cells were isolated from abdominal aortas of BAF60a<sup>ff</sup> (n=3) and BAF60a<sup>SMKO</sup> (n=3) mice and flow cytometry analysis was performed. **A**, Representative dot plots showing the gating strategy to obtain the macrophage population (CD11b<sup>+</sup>F4/80<sup>+</sup>) from gated CD45<sup>+</sup> leukocytes in the abdominal aortas. **B**, Quantitative analysis of the percentage of CD45<sup>+</sup> leukocytes. **C**, Quantitative analysis of the percentage of CD11b<sup>+</sup>F4/80<sup>+</sup> macrophages. **D**, Representative images of Mac2 staining and quantification analysis of Mac2<sup>+</sup> fraction in infrarenal abdominal aortas from BAF60a<sup>ff</sup> (n=10) and BAF60a<sup>SMKO</sup> (n=11) mice. Scale bar=100 μm; L indicates lumen. **E-F**, Serum concentration of MCP-1 (BAF60a<sup>ff</sup>, n=18; BAF60a<sup>SMKO</sup>, n=15) (**E**) and IL-6 (BAF60a<sup>ff</sup>, n=18; BAF60a<sup>SMKO</sup>, n=15) (**F**) was measured by ELISA. Data are presented as mean±SEM. Student's t-test for B-F.

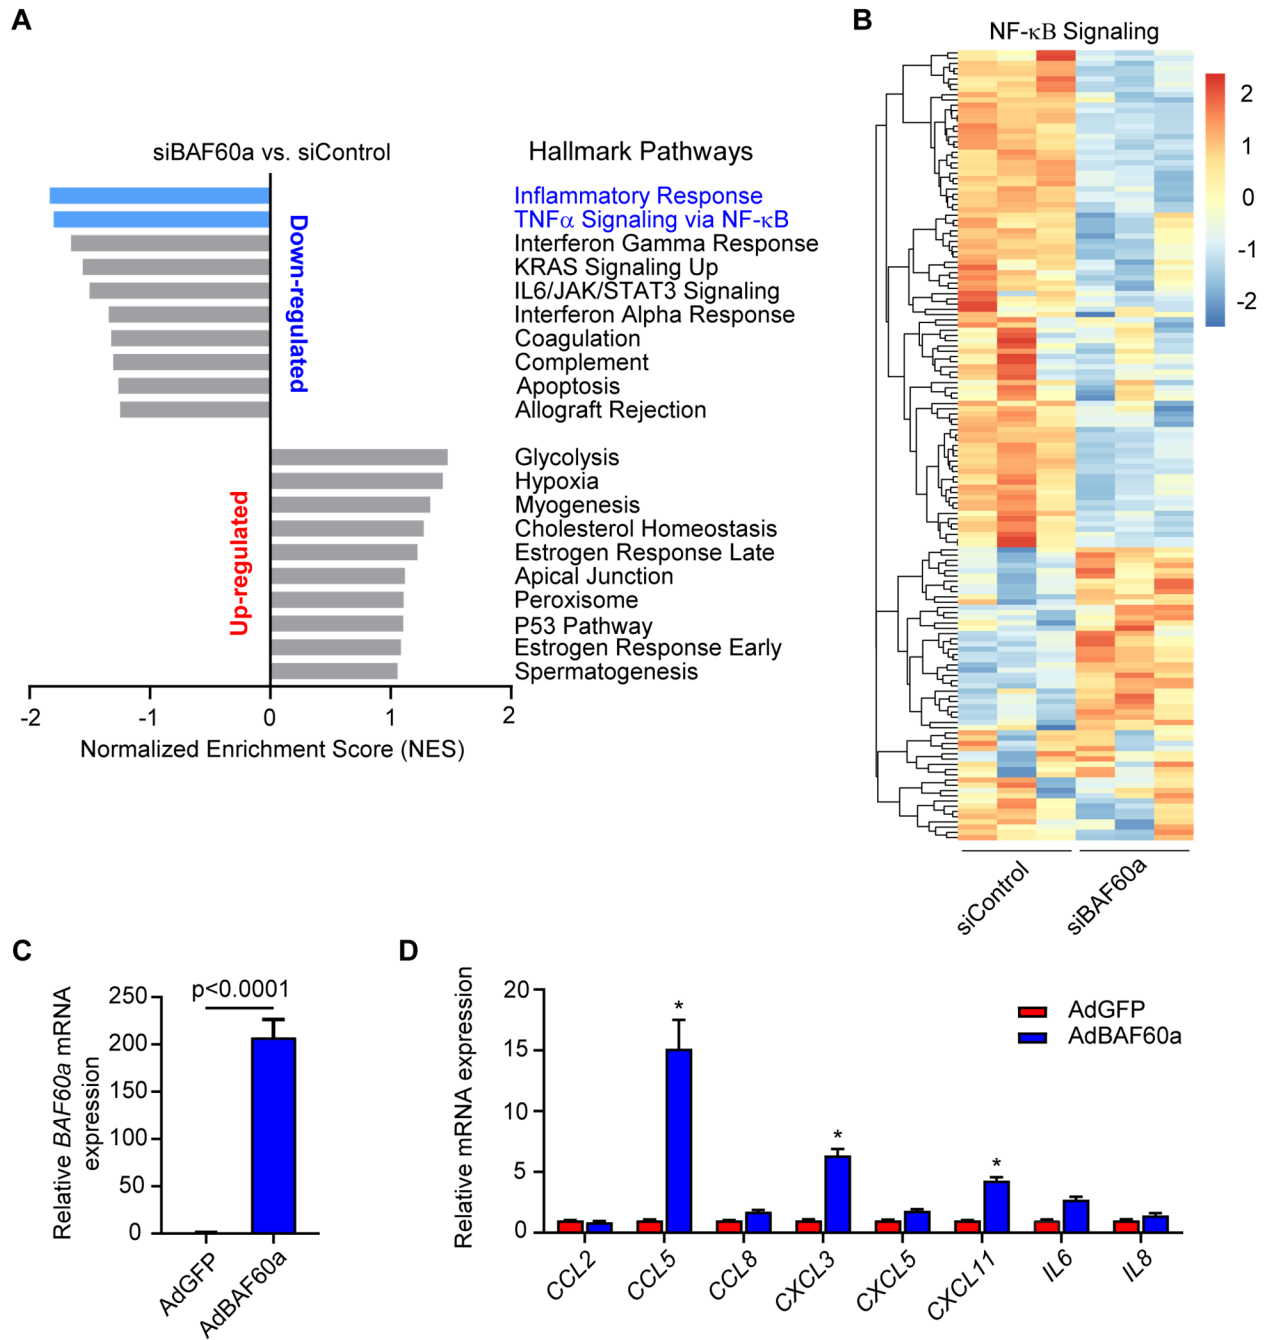

**Supplemental Figure X. BAF60a regulates vascular smooth muscle cell inflammation.** **A-B**, HASMCs were transfected with siControl or siBAF60a (30 nM). After 72 hours, total RNA was extracted for RNA-seq (n=3 for each group). **A**, Gene set enrichment analysis (GSEA) was performed using transcriptomic data from RNA-seq (siBAF60a vs. siControl). Bars show normalized enrichment scores (NES) of the top ten upregulated and downregulated pathways on the hallmark gene sets. **B**, Genes involved in NF- $\kappa$ B signaling are shown by a heatmap. Color bar [red to blue (2 to -2) vertical bar] denotes the row-scaled transcripts per million (TPM) value, representing the Z score of gene expression across samples. **C-D**, HASMCs were infected with AdGFP or AdBAF60a (20 MOI). Total RNA was extracted after 48 hours for RNA-

seq (n=3 for each group). **C**, BAF60a mRNA expression was determined by qPCR. n=3. **D**, qPCR Validation of representative NF- $\kappa$ B target genes identified by RNA-seq in 3 independent sets of samples. n=3 for each group. Data are presented as mean $\pm$ SEM. Student's t-test for C, one-way ANOVA followed by Tukey's post hoc analysis for D.

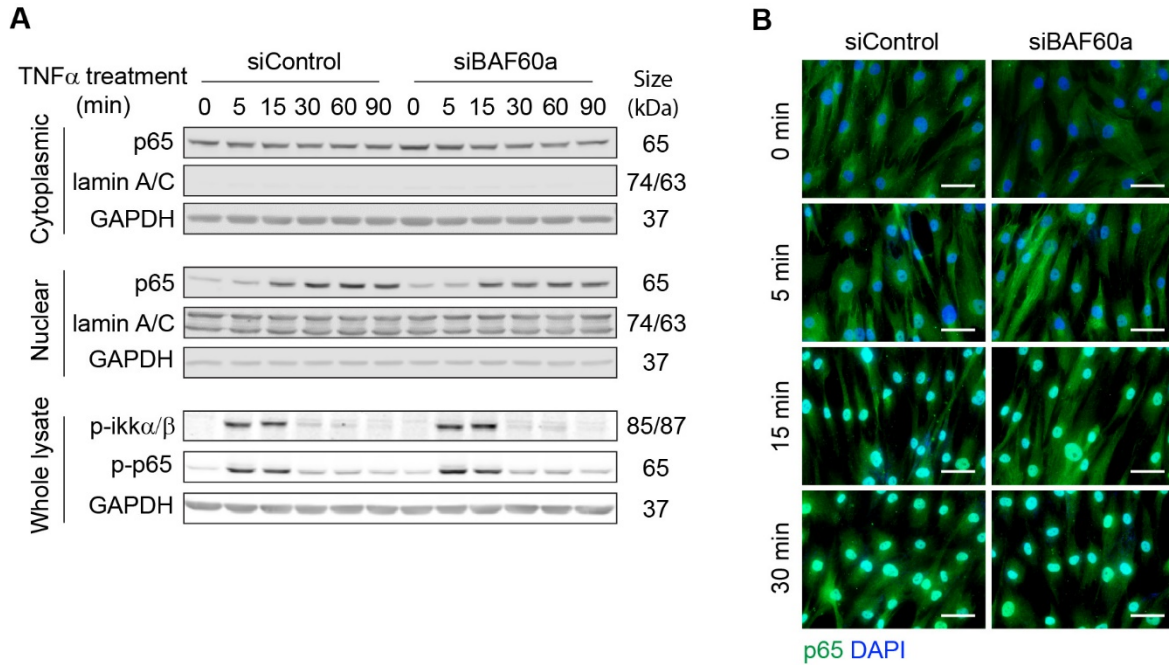

**Supplemental Figure XI. BAF60a depletion in VSMCs does not alter TNF $\alpha$ -induced p65 nuclear translocation.** HASMCs were transfected with siControl or siBAF60a (30 nM). After 72h, cells were stimulated by TNF $\alpha$  (20 ng/ml) for the indicated time. **A**, Representative Western blot analysis of cytoplasmic and nuclear p65 and the level of phosphorylated IKK $\alpha$ / $\beta$  and phosphorylated p65 after TNF $\alpha$  (20 ng/ml) stimulation. n=3. **B**, Representative images of immunofluorescence staining of p65 (green) and DAPI (blue) in HASMCs in the same conditions. n=3. Scale bar=50 $\mu$ m.



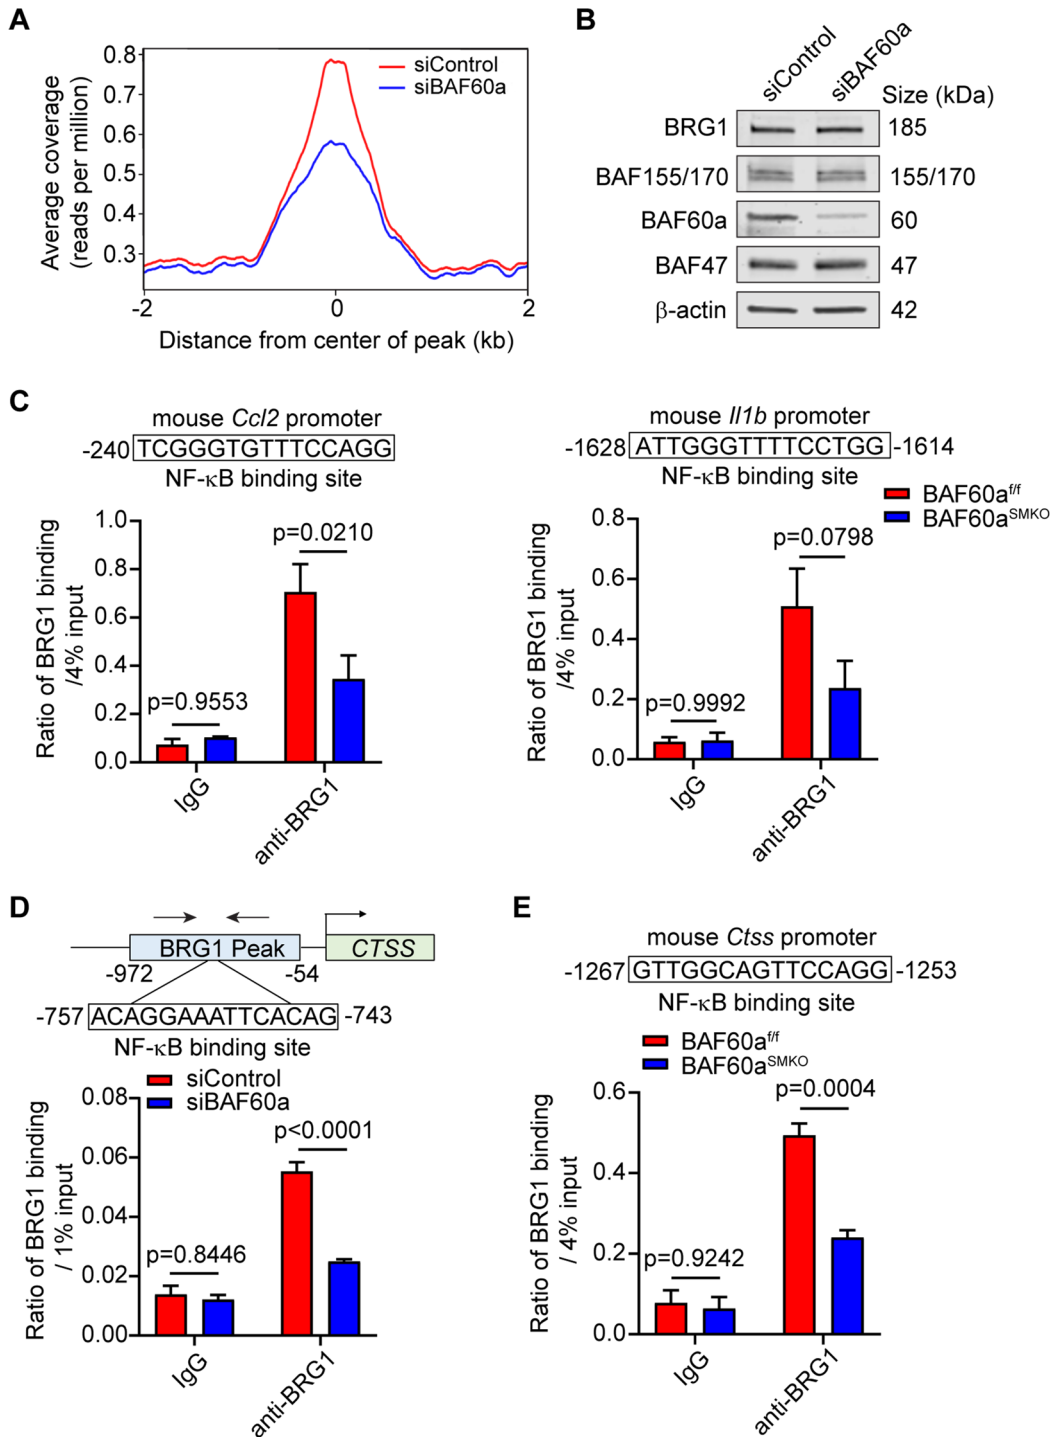

**Supplemental Figure XII. BAF60a is required for SWI/SNF complex recruitment to the promoters of NF-κB target genes.** **A**, Global occupancy of BRG1  $\pm 2$ kb surrounding the peak center from BRG1 ChIP-seq for HASMCs transfected with siControl or siBAF60a (30 nM) for 72h. **B**, Protein abundance of the SWI/SNF core subunits and BAF60a was determined by Western blot in whole lysates of HASMCs transfected with siControl or siBAF60a (30 nM) for

72h. n=3. **C**, BRG1 binding to the NF- $\kappa$ B binding site located in the mouse *Ccl2* (left panel) and *I11b* (right panel) promoters was detected by CHIP assay in primary aortic smooth muscle cells isolated from abdominal aortas of BAF60a<sup>fl/fl</sup> and BAF60a<sup>SMKO</sup> mice. n=3. **D**, BRG1 binding on the NF- $\kappa$ B binding site located in the *CTSS* promoter was detected by CHIP assay in HASMCs transfected with 30 nM siControl or siBAF60a for 72h. n=3. **E**, BRG1 binding to the NF- $\kappa$ B binding site located in the mouse *Ctss* promoter was detected by CHIP assay in primary aortic smooth muscle cells isolated from abdominal aortas of BAF60a<sup>fl/fl</sup> and BAF60a<sup>SMKO</sup> mice. n=3. Data are presented as mean  $\pm$  SEM. Two-way-ANOVA followed by Holm-Sidak post hoc analysis for C-E.

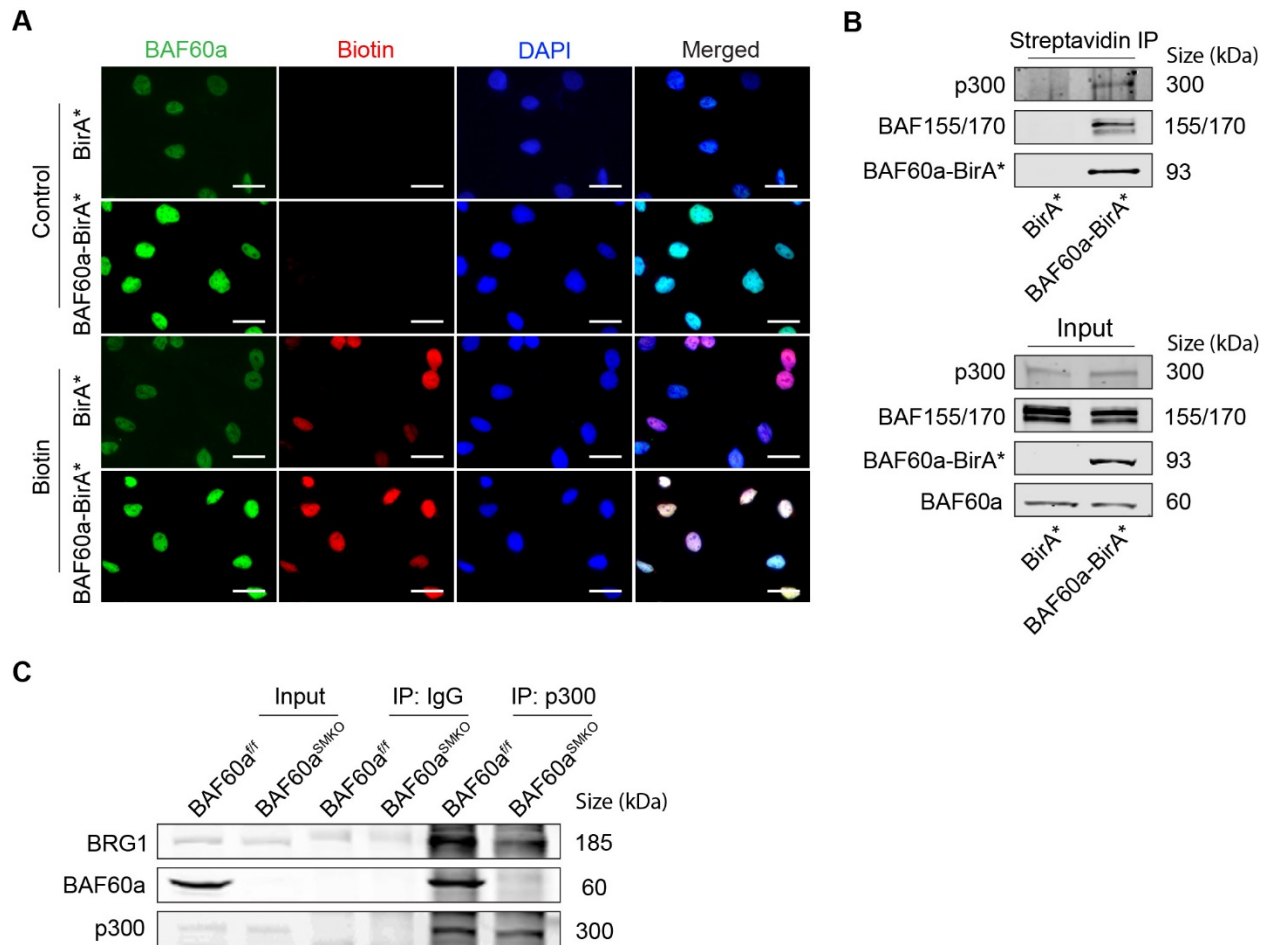

**Supplemental Figure XIII. BAF60a-BirA\* identified p300 as a BAF60a-interacting protein.**

**A**, A7r5 cells stably expressing BirA\* or BAF60a-BirA\* fusion protein were treated with or without biotin (50  $\mu$ M) for 24h. BAF60a (green) and biotinylated protein (red fluorescence-labeled streptavidin) were detected by immunofluorescence staining. Nuclei stained by DAPI are indicated in blue.  $n=3$ . Scale bar=50  $\mu$ m. **B**, A7r5 cells stably expressing BirA\* or BAF60a-BirA\* fusion protein were treated with biotin (50  $\mu$ M) for 24h, and biotin-labeled proteins were immunoprecipitated by streptavidin. p300 was detected by Western blot. BAF170 and BAF155 were used as positive controls.  $n=3$ . **C**, Physical interaction between p300 and BRG1 was detected by Co-IP assay using a p300 antibody, with IgG as the negative control, in primary aortic smooth muscle cells isolated from abdominal aortas of BAF60a<sup>ff</sup> and BAF60a<sup>SMKO</sup> mice.  $n=3$ .

**Supplemental table I Human AAA patients' information**

| Sample # | Sex | Age (y) | Race                                       | Description               | Antiplatelet drug | Anti-hypertensive drugs                                                              | Blood lipid reducing drugs       | qPCR | Western blot |
|----------|-----|---------|--------------------------------------------|---------------------------|-------------------|--------------------------------------------------------------------------------------|----------------------------------|------|--------------|
| 1        | M   | 65      | Caucasian                                  | Abdominal aortic aneurysm | yes               | Beta-Adrenergic Blocking Agents, Calcium Channel Blockers                            | Statins, Fibrin Acid Derivatives | yes  |              |
| 2        | M   | 61      | Caucasian                                  | Abdominal aortic aneurysm | N/A               | N/A                                                                                  | Statins, Fibrin Acid Derivatives | yes  | yes          |
| 3        | M   | 60      | Caucasian                                  | Abdominal aortic aneurysm | yes               | Angiotensin-Converting Enzyme Inhibitors, Beta-Adrenergic Blocking Agents, Diuretics | Statins, Fibrin Acid Derivatives | yes  |              |
| 4        | M   | 65      | Caucasian                                  | Abdominal aortic aneurysm | yes               | Calcium Channel Blockers                                                             | Statins, Fibrin Acid Derivatives | yes  |              |
| 5        | M   | 66      | Caucasian                                  | Abdominal aortic aneurysm | yes               | Angiotensin-Converting Enzyme Inhibitors, Beta-Adrenergic Blocking Agents            | Statins, Fibrin Acid Derivatives |      | yes          |
| 6        | M   | 72      | Caucasian                                  | Abdominal aortic aneurysm | yes               | Beta-Adrenergic Blocking Agents                                                      | N/A                              | yes  |              |
| 7        | M   | 65      | Caucasian                                  | Abdominal aortic aneurysm | yes               | Beta-Adrenergic Blocking Agents                                                      | Statins, Fibrin Acid Derivatives | yes  |              |
| 8        | F   | 58      | Caucasian                                  | Abdominal aortic aneurysm | yes               | Angiotensin-Converting Enzyme Inhibitors, Beta-Adrenergic Blocking Agents, Diuretics | Statins, Fibrin Acid Derivatives | yes  | yes          |
| 9        | M   | 50      | African American                           | Abdominal aortic aneurysm | N/A               | N/A                                                                                  | N/A                              | yes  | yes          |
| 10       | M   | 31      | Caucasian                                  | Abdominal aortic aneurysm | N/A               | N/A                                                                                  | N/A                              | yes  |              |
| 11       | M   | 71      | American Indian or Alaska Native/Caucasian | Abdominal aortic aneurysm | N/A               | N/A                                                                                  | N/A                              | yes  |              |

|    |   |    |                  |                        |     |                                                                                |                                  |     |     |
|----|---|----|------------------|------------------------|-----|--------------------------------------------------------------------------------|----------------------------------|-----|-----|
| 12 | M | 37 | Caucasian        | Heart transplant donor | N/A | N/A                                                                            | N/A                              | yes |     |
| 13 | F | 39 | Caucasian        | Heart transplant donor | yes | Diuretics                                                                      | Statins, Fibrin Acid Derivatives | yes | yes |
| 14 | F | 26 | African American | Heart transplant donor | N/A | Diuretics                                                                      | N/A                              | yes |     |
| 15 | M | 54 | Caucasian        | Heart transplant donor | N/A | N/A                                                                            | N/A                              | yes | yes |
| 16 | M | 59 | Caucasian        | Heart transplant donor | N/A | N/A                                                                            | N/A                              | yes |     |
| 17 | F | 64 | Caucasian        | Heart transplant donor | yes | Calcium Channel Blockers                                                       | Statins, Fibrin Acid Derivatives | yes |     |
| 18 | M | 61 | Caucasian        | Heart transplant donor | yes | N/A                                                                            | N/A                              | yes |     |
| 19 | M | 69 | Caucasian        | Heart transplant donor | N/A | N/A                                                                            | N/A                              | yes |     |
| 20 | M | 65 | Caucasian        | Heart transplant donor | yes | N/A                                                                            | N/A                              |     | yes |
| 21 | M | 68 | Caucasian        | Heart transplant donor | N/A | Angiotensin-2 Receptor Antagonists, Beta-Adrenergic Blocking Agents, Diuretics | N/A                              | yes | yes |
| 22 | F | 55 | Caucasian        | Heart transplant donor | yes | Diuretics                                                                      | N/A                              | yes |     |

**Supplemental Table II. Characteristics of the BAF60a<sup>fl/fl</sup> and BAF60a<sup>SMKO</sup> mice subjected to the AngII-induced AAA model at the 28 days' endpoint**

| Group                       | BAF60a <sup>fl/fl</sup> | BAF60a <sup>SMKO</sup> |
|-----------------------------|-------------------------|------------------------|
| Number of mice              | 24                      | 25                     |
| Number of ruptures          | 3                       | 1                      |
| Number of AAA               | 12                      | 2                      |
| Maximal Diameter of AA (mm) | 1.41±0.09               | 1.05±0.05              |
| SBP baseline (mmHg)         | 106±2                   | 106±1                  |
| SBP + AngII (mmHg)          | 152±2                   | 152±2                  |
| Body weight (g)             | 25.9±0.6                | 25.3±0.5               |
| TC (mg/dL)                  | 740±43                  | 662±35                 |
| TG (mg/dL)                  | 387±54                  | 245±29                 |

Data are presented as mean±SEM. AAA, abdominal aortic aneurysm; AA, abdominal aorta; SBP, systolic blood pressure; TC, total cholesterol; TG, triglycerides.

**Supplemental Table III. Characteristics of the BAF60a<sup>ff</sup> and BAF60a<sup>SMKO</sup> mice 14 days after elastase exposure**

| Group                       | BAF60a <sup>ff</sup> | BAF60a <sup>SMKO</sup> |
|-----------------------------|----------------------|------------------------|
| Number of mice              | 18                   | 15                     |
| Number of AAA               | 13                   | 1                      |
| Maximal Diameter of AA (mm) | 0.83±0.04            | 0.58±0.02              |
| SBP (mmHg)                  | 105±2                | 109±3                  |
| Body weight (g)             | 28.4±0.4             | 27.1±0.5               |
| TC (mg/dL)                  | 105±6                | 93±8                   |
| TG (mg/dL)                  | 121±6                | 114±6                  |

Data are presented as mean±SEM. AAA, abdominal aortic aneurysm; AA, abdominal aorta; SBP, systolic blood pressure; TC, total cholesterol; TG, triglycerides.

**Supplemental Table IV: GSEA report for the RNA-seq data on HASMCs transfected with siBAF60a vs. siControl**

**Supplemental Table IVa: Gene sets enriched in HASMCs transfected with siControl**

| Name                                              | Size | ES         | NES        | NOM <i>p</i> -val | FDR <i>q</i> -val | FWER <i>p</i> -val | Rank at Max | Leading Edge                   |
|---------------------------------------------------|------|------------|------------|-------------------|-------------------|--------------------|-------------|--------------------------------|
| Hallmark_Inflammatory Response                    | 197  | -0.5248261 | -1.8330    | 0                 | 0.0014            | 0.001              | 4345        | tags=39%, list=12%, signal=44% |
| Hallmark_TNF $\alpha$ Signaling via NF $\kappa$ B | 198  | -0.5190536 | -1.7997944 | 0                 | 7.14E-04          | 0.001              | 4432        | tags=49%, list=13%, signal=56% |
| Hallmark_Interferon Gamma Response                | 197  | -0.477279  | -1.6564283 | 0                 | 0.0058            | 0.008              | 4394        | tags=35%, list=12%, signal=39% |
| Hallmark_KRAS Signaling Up                        | 194  | -0.4546483 | -1.5589495 | 0                 | 0.0151            | 0.025              | 1808        | tags=26%, list=5%, signal=27%  |
| Hallmark_IL6/JAK/STAT3 Signaling                  | 87   | -0.4899177 | -1.5033814 | 0.0048            | 0.0208            | 0.042              | 2276        | tags=29%, list=6%, signal=31%  |
| Hallmark_Interferon Alpha Response                | 93   | -0.4231654 | -1.3420421 | 0.0146            | 0.0813            | 0.194              | 4380        | tags=34%, list=12%, signal=39% |
| Hallmark_Coagulation                              | 136  | -0.3978205 | -1.3213208 | 0.0061            | 0.0860            | 0.228              | 4312        | tags=26%, list=12%, signal=30% |
| Hallmark_Complement                               | 195  | -0.3772207 | -1.3050694 | 0                 | 0.0900            | 0.266              | 4528        | tags=27%, list=13%, signal=31% |
| Hallmark_Apoptosis                                | 159  | -0.3710751 | -1.2615163 | 0.0154            | 0.1136            | 0.358              | 5380        | tags=38%, list=15%, signal=44% |
| Hallmark_Allograft Rejection                      | 199  | -0.3584006 | -1.2464709 | 0.0081            | 0.1181            | 0.403              | 3521        | tags=23%, list=10%, signal=26% |
| Hallmark_Xenobiotic Metabolism                    | 198  | -0.3413361 | -1.1839731 | 0.0161            | 0.1815            | 0.588              | 3594        | tags=26%, list=10%, signal=29% |
| Hallmark_Apical Surface                           | 43   | -0.3939157 | -1.0938723 | 0.2872            | 0.3512            | 0.847              | 5240        | tags=40%, list=15%, signal=46% |
| Hallmark_Unfolded Protein Response                | 140  | -0.3225256 | -1.0713874 | 0.2289            | 0.3875            | 0.903              | 5659        | tags=36%, list=16%, signal=42% |
| Hallmark_Angiogenesis                             | 109  | -0.3346617 | -1.0513581 | 0.3164            | 0.4133            | 0.93               | 4683        | tags=29%, list=13%, signal=34% |
| Hallmark_UV Response DN                           | 36   | -0.3959701 | -1.047586  | 0.3597            | 0.3964            | 0.936              | 3402        | tags=33%, list=10%, signal=37% |
| Hallmark_mTORC1 Signaling                         | 197  | -0.2987588 | -1.0410534 | 0.2946            | 0.3914            | 0.939              | 3750        | tags=28%, list=11%, signal=31% |



|                            |     |            |            |        |        |       |      |                                |
|----------------------------|-----|------------|------------|--------|--------|-------|------|--------------------------------|
| Hallmark_Androgen Response | 97  | -0.3194047 | -1.0193276 | 0.3915 | 0.4375 | 0.967 | 2764 | tags=24%, list=8%, signal=26%  |
| Hallmark_Protein Secretion | 194 | -0.2717993 | -0.934126  | 0.7414 | 0.7389 | 1     | 5533 | tags=30%, list=16%, signal=35% |
| Hallmark_G2M Checkpoint    | 96  | -0.2869166 | -0.9136794 | 0.7581 | 0.7736 | 1     | 3967 | tags=27%, list=11%, signal=30% |
| Hallmark_Notch Signaling   | 32  | -0.2999279 | -0.7913953 | 0.8721 | 0.9615 | 1     | 4252 | tags=34%, list=12%, signal=39% |

ES: enrichment score

NES: normalized enrichment score

NOM  $p$ -val: nominal  $p$ -value

FDR  $q$ -val:  $p$ -value adjusted for the False Discovery Rate

FWER  $p$ -val:  $p$ -value adjusted for the Familywise Error Rate

**Supplemental Table IV: GSEA report for the RNA-seq data on HASMCs transfected with siBAF60a vs. siControl**

**Supplemental Table IVb: Gene sets enriched in HASMCs transfected with siBAF60a**

| Name                             | Size | ES     | NES    | NOM <i>p</i> -val | FDR <i>q</i> -val | FWER <i>p</i> -val | Rank at Max | Leading Edge                   |
|----------------------------------|------|--------|--------|-------------------|-------------------|--------------------|-------------|--------------------------------|
| Hallmark_Glycolysis              | 198  | 0.5024 | 1.4587 | 0                 | 0.1552            | 0.194              | 5372        | tags=34%, list=15%, signal=40% |
| Hallmark_Hypoxia                 | 194  | 0.4921 | 1.4428 | 0                 | 0.0989            | 0.237              | 5801        | tags=39%, list=16%, signal=47% |
| Hallmark_Myogenesis              | 199  | 0.4522 | 1.3279 | 0.0151            | 0.2879            | 0.706              | 5891        | tags=31%, list=17%, signal=37% |
| Hallmark_Cholesterol Homeostasis | 73   | 0.4817 | 1.2810 | 0.0683            | 0.3674            | 0.872              | 7154        | tags=41%, list=20%, signal=51% |
| Hallmark_Estrogen Response Late  | 198  | 0.4222 | 1.2282 | 0.0652            | 0.5142            | 0.98               | 5666        | tags=32%, list=16%, signal=38% |
| Hallmark_Apical Junction         | 194  | 0.3834 | 1.1290 | 0.1799            | 1                 | 1                  | 5432        | tags=29%, list=15%, signal=35% |
| Hallmark_Peroxisome              | 103  | 0.4046 | 1.1129 | 0.2484            | 1                 | 1                  | 4591        | tags=25%, list=13%, signal=29% |
| Hallmark_P53 Pathway             | 195  | 0.3773 | 1.1069 | 0.2209            | 0.9204            | 1                  | 7129        | tags=39%, list=20%, signal=49% |
| Hallmark_Estrogen Response Early | 197  | 0.3739 | 1.0933 | 0.2576            | 0.9001            | 1                  | 5865        | tags=31%, list=17%, signal=37% |
| Hallmark_Spermatogenesis         | 133  | 0.3733 | 1.0549 | 0.3436            | 1                 | 1                  | 5927        | tags=27%, list=17%, signal=32% |
| Hallmark_Myc Targets V1          | 197  | 0.3579 | 1.0421 | 0.3589            | 1                 | 1                  | 8628        | tags=41%, list=24%, signal=54% |
| Hallmark_E2f Targets             | 196  | 0.3526 | 1.0279 | 0.4045            | 1                 | 1                  | 8336        | tags=40%, list=24%, signal=52% |
| Hallmark_Myc Targets V2          | 58   | 0.3935 | 1.0107 | 0.4394            | 1                 | 1                  | 8057        | tags=40%, list=23%, signal=51% |
| Hallmark_Fatty Acid Metabolism   | 156  | 0.3513 | 1.0084 | 0.4350            | 0.9661            | 1                  | 4956        | tags=22%, list=14%, signal=25% |
| Hallmark_UV Response Up          | 154  | 0.3426 | 0.9887 | 0.4889            | 0.9939            | 1                  | 7809        | tags=38%, list=22%, signal=48% |
| Hallmark_Heme Metabolism         | 194  | 0.3296 | 0.9629 | 0.5836            | 1                 | 1                  | 4322        | tags=23%, list=12%, signal=26% |

|                                            |     |        |        |        |        |   |      |                                |
|--------------------------------------------|-----|--------|--------|--------|--------|---|------|--------------------------------|
| Hallmark_Bile Acid Metabolism              | 112 | 0.3388 | 0.9394 | 0.5888 | 1      | 1 | 7294 | tags=33%, list=21%, signal=41% |
| Hallmark_Mitotic Spindle                   | 197 | 0.3193 | 0.9263 | 0.6636 | 1      | 1 | 8200 | tags=39%, list=23%, signal=50% |
| Hallmark_Epithelial Mesenchymal Transition | 197 | 0.3065 | 0.9051 | 0.6958 | 1      | 1 | 4956 | tags=23%, list=14%, signal=26% |
| Hallmark_PI3K/AKT/mTOR Signaling           | 104 | 0.3291 | 0.8918 | 0.6949 | 1      | 1 | 6878 | tags=33%, list=19%, signal=40% |
| Hallmark_IL2/STAT5 Signaling               | 195 | 0.3001 | 0.8825 | 0.7733 | 1      | 1 | 6978 | tags=33%, list=20%, signal=41% |
| Hallmark_Hedgehog Signaling                | 35  | 0.3691 | 0.8725 | 0.6790 | 1      | 1 | 3768 | tags=26%, list=11%, signal=29% |
| Hallmark_KRAS Signaling DN                 | 190 | 0.2978 | 0.8647 | 0.8104 | 1      | 1 | 7793 | tags=28%, list=22%, signal=36% |
| Hallmark_Pancreas Beta Cells               | 40  | 0.3528 | 0.8510 | 0.7479 | 1      | 1 | 3947 | tags=23%, list=11%, signal=25% |
| Hallmark_DNA Repair                        | 141 | 0.2951 | 0.8398 | 0.8372 | 1      | 1 | 7896 | tags=34%, list=22%, signal=44% |
| Hallmark_Reactive Oxygen Species Pathway   | 45  | 0.3408 | 0.8353 | 0.7702 | 0.9749 | 1 | 3502 | tags=24%, list=10%, signal=27% |
| Hallmark_Adipogenesis                      | 190 | 0.2655 | 0.7778 | 0.9595 | 1      | 1 | 7775 | tags=31%, list=22%, signal=40% |
| Hallmark_TGFβ Signaling                    | 54  | 0.2920 | 0.7397 | 0.9230 | 1      | 1 | 7337 | tags=33%, list=21%, signal=42% |
| Hallmark_Wnt/β-catenin Signaling           | 42  | 0.3022 | 0.7343 | 0.9080 | 1      | 1 | 9697 | tags=45%, list=27%, signal=62% |
| Hallmark_Oxidative Phosphorylation         | 183 | 0.2344 | 0.6764 | 1      | 0.9948 | 1 | 9507 | tags=34%, list=27%, signal=47% |

**Supplemental Table V: RNA-seq analysis of the NF- $\kappa$ B target genes in HASMCs**

**Supplemental Table Va: RNA-seq analysis of the NF- $\kappa$ B target genes in HASMCs transfected with siControl or siBAF60a**

| gene_ensembl_id | gene_name | base Mean | TPM_siC<br>ontrol_1 | TPM_siC<br>ontrol_2 | TPM_siC<br>ontrol_3 | TPM_siB<br>AF60a_1 | TPM_siB<br>AF60a_2 | TPM_siB<br>AF60a_3 | log2Fold<br>Change | lfcSE  | stat   | p value  | p adj    |
|-----------------|-----------|-----------|---------------------|---------------------|---------------------|--------------------|--------------------|--------------------|--------------------|--------|--------|----------|----------|
| ENSG00000165029 | ABCA1     | 4208.461  | 24.205              | 18.523              | 20.134              | 14.155             | 12.458             | 13.756             | -0.666             | 0.1083 | -6.151 | 7.71E-10 | 2.66E-08 |
| ENSG00000081051 | AFP       | 32.14958  | 4.4089              | 5.1093              | 4.8704              | 3.9484             | 4.2027             | 3.7569             | -0.3321            | 0.232  | -1.431 | 0.15229  | 0.34373  |
| ENSG00000153207 | AHCTF1    | 2762.14   | 29.655              | 27.375              | 25.339              | 23.886             | 25.826             | 27.844             | -0.2452            | 0.0939 | -2.61  | 0.00904  | 0.04378  |
| ENSG00000187134 | AKR1C1    | 46466.94  | 1070.6              | 1017.3              | 1061                | 617.51             | 639.04             | 601.02             | -0.8044            | 0.108  | -7.449 | 9.37E-14 | 5.68E-12 |
| ENSG00000242110 | AMACR     | 409.9856  | 3.7828              | 3.9132              | 4.4801              | 2.4686             | 2.5231             | 2.772              | -0.6483            | 0.1312 | -4.941 | 7.8E-07  | 1.5E-05  |
| ENSG00000154188 | ANGPT1    | 1164.308  | 6.7709              | 8.1133              | 5.8026              | 9.9746             | 9.2248             | 10.671             | 0.42934            | 0.1269 | 3.382  | 0.00072  | 0.00562  |
| ENSG00000101246 | ARFRP1    | 1192.079  | 50.079              | 53.711              | 41.726              | 55.456             | 53.62              | 51.763             | 0.14727            | 0.1727 | 0.853  | 0.39376  | 0.62167  |
| ENSG00000198363 | ASPH      | 19116.21  | 758.24              | 840.81              | 693.72              | 450.87             | 508.69             | 468.05             | -0.7349            | 0.0862 | -8.529 | 1.48E-17 | 1.35E-15 |
| ENSG00000130707 | ASS1      | 5023.933  | 321.46              | 279.12              | 315.53              | 339.29             | 306.52             | 332.55             | 0.06195            | 0.0908 | 0.682  | 0.49517  | 0.70617  |
| ENSG00000166710 | B2M       | 114363.9  | 9459.3              | 10388               | 9521.8              | 8561               | 9990.5             | 9313.8             | -0.1663            | 0.062  | -2.68  | 0.00735  | 0.03737  |
| ENSG00000087088 | BAX       | 3216.073  | 254.37              | 236.21              | 271.28              | 261.89             | 263.41             | 278.71             | 0.05288            | 0.0807 | 0.655  | 0.5124   | 0.72075  |
| ENSG00000140379 | BCL2A1    | 55.90206  | 4.9334              | 5.2774              | 3.7608              | 1.5904             | 2.2633             | 3.1628             | -1.3731            | 0.3496 | -3.928 | 8.6E-05  | 0.00093  |
| ENSG00000171552 | BCL2L1    | 2655.182  | 18.162              | 18.105              | 19.323              | 24.779             | 28.279             | 24.394             | 0.38214            | 0.0861 | 4.436  | 9.2E-06  | 0.00014  |
| ENSG00000100739 | BDKRB1    | 788.5608  | 30.671              | 26.906              | 27.374              | 26.106             | 28.282             | 26.034             | -0.1293            | 0.0816 | -1.585 | 0.11297  | 0.2823   |
| ENSG00000176697 | BDNF      | 1516.868  | 4.5615              | 4.157               | 4.2975              | 5.3219             | 5.3973             | 6.7627             | 0.17502            | 0.1738 | 1.007  | 0.31392  | 0.5425   |
| ENSG00000182492 | BGN       | 44931.2   | 371.67              | 326.93              | 373.19              | 370.31             | 335.22             | 361.97             | -0.023             | 0.078  | -0.295 | 0.76787  | 0.88571  |
| ENSG00000125378 | BMP4      | 684.2205  | 4.309               | 4.2132              | 5.2152              | 7.8772             | 9.5677             | 9.7276             | 0.97263            | 0.2142 | 4.541  | 5.6E-06  | 8.8E-05  |
| ENSG00000176171 | BNIP3     | 4453.834  | 42.053              | 50.395              | 44.531              | 71.068             | 75.758             | 63.76              | 0.62835            | 0.1026 | 6.122  | 9.24E-10 | 3.13E-08 |
| ENSG00000105974 | CAV1      | 9984.462  | 126.58              | 121.35              | 123.16              | 96.331             | 90.378             | 90.598             | -0.4287            | 0.0722 | -5.936 | 2.92E-09 | 9.26E-08 |
| ENSG00000108691 | CCL2      | 6380.218  | 570.44              | 556.63              | 558.29              | 226.79             | 228.38             | 273.47             | -1.3086            | 0.0959 | -13.65 | 2.01E-42 | 1.27E-39 |
| ENSG00000115009 | CCL20     | 45.92178  | 13.781              | 17.268              | 14.103              | 4.1487             | 4.5235             | 7.0235             | -1.7819            | 0.2911 | -6.121 | 9.29E-10 | 3.15E-08 |
| ENSG00000271503 | CCL5      | 73.46322  | 15.262              | 16.27               | 16.102              | 6.6668             | 9.1856             | 6.2968             | -1.1548            | 0.133  | -8.685 | 3.78E-18 | 3.62E-16 |
| ENSG00000108688 | CCL7      | 109.1916  | 84.524              | 93.49               | 75.292              | 30.037             | 33.817             | 39.711             | -1.2332            | 0.1352 | -9.12  | 7.49E-20 | 8.83E-18 |
| ENSG00000108700 | CCL8      | 42.20367  | 28.901              | 28.543              | 26.671              | 8.7385             | 8.7427             | 8.5772             | -1.7042            | 0.1714 | -9.941 | 2.76E-23 | 4.46E-21 |
| ENSG00000110092 | CCND1     | 23974.1   | 238.78              | 192.19              | 214.86              | 179.29             | 163.04             | 191.93             | -0.4291            | 0.1656 | -2.59  | 0.00958  | 0.04595  |
| ENSG00000120217 | CD274     | 130.3621  | 9.9148              | 11.298              | 8.6132              | 5.259              | 5.0866             | 4.2276             | -1.118             | 0.1565 | -7.143 | 9.15E-13 | 4.93E-11 |
| ENSG00000004468 | CD38      | 76.90484  | 23.315              | 21.775              | 18.894              | 10.513             | 8.7196             | 9.9822             | -1.1261            | 0.2113 | -5.329 | 9.89E-08 | 2.3E-06  |
| ENSG00000101017 | CD40      | 256.7601  | 5.3183              | 5.4857              | 5.2896              | 4.2334             | 4.0953             | 3.7486             | -0.4702            | 0.1493 | -3.149 | 0.00164  | 0.01111  |
| ENSG00000026508 | CD44      | 11653.6   | 915.2               | 942.59              | 846.71              | 669.23             | 680.41             | 702.62             | -0.4644            | 0.0476 | -9.763 | 1.62E-22 | 2.46E-20 |
| ENSG00000124762 | CDKN1A    | 47916.69  | 287.38              | 283                 | 303.06              | 246.64             | 240.29             | 221.87             | -0.2965            | 0.0844 | -3.514 | 0.00044  | 0.00376  |
| ENSG00000221869 | CEBPD     | 4289.938  | 26.569              | 30.076              | 30.845              | 27.693             | 30.514             | 24.366             | -0.0866            | 0.1125 | -0.77  | 0.44152  | 0.66237  |

|                 |         |          |        |        |        |        |        |        |         |        |        |          |          |
|-----------------|---------|----------|--------|--------|--------|--------|--------|--------|---------|--------|--------|----------|----------|
| ENSG0000003402  | CFLAR   | 2867.429 | 45.782 | 52.772 | 44.427 | 38.957 | 43.763 | 39.763 | -0.2963 | 0.0894 | -3.313 | 0.00092  | 0.00694  |
| ENSG00000133048 | CHI3L1  | 26.0331  | 2.8629 | 2.4551 | 1.9567 | 1.2284 | 1.2992 | 2.0853 | -0.5618 | 0.2484 | -2.261 | 0.02373  | 0.09257  |
| ENSG00000164692 | COL1A2  | 808162.1 | 5085.6 | 4848.6 | 5000   | 5005.1 | 4822.1 | 4840   | -0.0383 | 0.0666 | -0.575 | 0.56511  | 0.75751  |
| ENSG00000107175 | CREB3   | 2944.384 | 44.145 | 40.512 | 42.843 | 38.762 | 36.308 | 41.762 | -0.1692 | 0.0791 | -2.14  | 0.03232  | 0.11646  |
| ENSG00000184371 | CSF1    | 1311.846 | 31.92  | 29.924 | 29.356 | 23.67  | 21.969 | 20.771 | -0.6024 | 0.1349 | -4.467 | 7.9E-06  | 0.00012  |
| ENSG00000108342 | CSF3    | 206.6006 | 31.779 | 30.411 | 34.909 | 7.0175 | 7.6376 | 15.812 | -2.0664 | 0.5936 | -3.481 | 0.0005   | 0.00414  |
| ENSG00000164733 | CTSB    | 50530.65 | 859.37 | 742.27 | 822.48 | 776.77 | 750.84 | 765.95 | -0.1245 | 0.0657 | -1.893 | 0.05829  | 0.17815  |
| ENSG00000163739 | CXCL1   | 7266.801 | 967.93 | 939.81 | 934.76 | 690.46 | 770.81 | 965.74 | -0.3888 | 0.1735 | -2.241 | 0.02501  | 0.09643  |
| ENSG00000169245 | CXCL10  | 312.3122 | 195.19 | 233.24 | 180.79 | 135.8  | 149.44 | 135.5  | -0.5816 | 0.1553 | -3.746 | 0.00018  | 0.00178  |
| ENSG00000169248 | CXCL11  | 40.10742 | 35.961 | 35.769 | 33.404 | 12.682 | 17.79  | 12.145 | -1.364  | 0.1634 | -8.349 | 6.91E-17 | 5.97E-15 |
| ENSG00000163734 | CXCL3   | 799.9816 | 191.23 | 210.45 | 194.28 | 70.329 | 71.34  | 85.559 | -1.3776 | 0.1168 | -11.79 | 4.35E-32 | 1.84E-29 |
| ENSG00000163735 | CXCL5   | 1508.181 | 203.45 | 237.04 | 192.63 | 87.634 | 107.44 | 123.07 | -0.9732 | 0.1246 | -7.81  | 5.73E-15 | 4.09E-13 |
| ENSG00000124875 | CXCL6   | 7403.422 | 712.77 | 784.73 | 765.81 | 413.48 | 471.81 | 467    | -0.7562 | 0.1133 | -6.676 | 2.46E-11 | 1.10E-09 |
| ENSG00000169429 | CXCL8   | 11448.79 | 513.94 | 522.67 | 481.82 | 209.84 | 240.14 | 398.96 | -1.1211 | 0.4233 | -2.649 | 0.00808  | 0.0402   |
| ENSG00000132912 | DCTN4   | 3965.462 | 32.316 | 27.49  | 28.175 | 26.396 | 24.652 | 24.916 | -0.3485 | 0.0865 | -4.03  | 5.6E-05  | 0.00065  |
| ENSG00000211448 | DIO2    | 17385.73 | 73.345 | 62.685 | 65.6   | 38.656 | 42.996 | 61.897 | -0.7666 | 0.3205 | -2.392 | 0.01677  | 0.07127  |
| ENSG00000188641 | DPYD    | 3966.34  | 8.7166 | 8.0883 | 7.8865 | 8.9773 | 9.9593 | 8.5773 | 0.10435 | 0.111  | 0.94   | 0.3473   | 0.57713  |
| ENSG00000120129 | DUSP1   | 1174.954 | 12.151 | 10.685 | 11.43  | 8.0818 | 8.5796 | 10.993 | -0.5778 | 0.2316 | -2.495 | 0.0126   | 0.0571   |
| ENSG00000146648 | EGFR    | 6854.809 | 14.663 | 14.265 | 13.731 | 11.775 | 11.009 | 11.615 | -0.3281 | 0.0685 | -4.79  | 1.7E-06  | 3E-05    |
| ENSG00000120738 | EGR1    | 2503.573 | 3.6516 | 3.0947 | 2.7989 | 2.9332 | 2.748  | 2.8657 | -0.1717 | 0.1572 | -1.093 | 0.27448  | 0.49955  |
| ENSG00000111674 | ENO2    | 2148.539 | 35.887 | 44.336 | 47.957 | 77.128 | 70.907 | 63.032 | 0.65141 | 0.1133 | 5.751  | 8.90E-09 | 2.5E-07  |
| ENSG00000070404 | FSTL3   | 1786.831 | 7.4895 | 6.4259 | 8.104  | 10.44  | 11.506 | 11.711 | 0.43746 | 0.139  | 3.147  | 0.00165  | 0.01117  |
| ENSG00000167996 | FTH1    | 239320.5 | 12873  | 13412  | 12995  | 11358  | 11949  | 10884  | -0.2117 | 0.0814 | -2.599 | 0.00935  | 0.04496  |
| ENSG00000160211 | G6PD    | 8457.087 | 120.58 | 111.13 | 142.22 | 105.31 | 102.67 | 102.08 | -0.2983 | 0.0984 | -3.031 | 0.00244  | 0.01543  |
| ENSG00000099860 | GADD45B | 662.403  | 23.982 | 22.633 | 32.374 | 25.414 | 19.57  | 15.269 | -0.5056 | 0.1962 | -2.577 | 0.00997  | 0.04729  |
| ENSG00000117228 | GBP1    | 2964.156 | 75.107 | 81.912 | 64.923 | 62.995 | 67.995 | 66.458 | -0.2497 | 0.1089 | -2.293 | 0.02187  | 0.08701  |
| ENSG00000001084 | GCLC    | 1394.256 | 49.898 | 48.5   | 43.266 | 28.161 | 32.258 | 36.269 | -0.6417 | 0.1336 | -4.801 | 1.6E-06  | 2.8E-05  |
| ENSG00000023909 | GCLM    | 2243.257 | 55.027 | 60.006 | 56.239 | 70.037 | 78.915 | 66.139 | 0.30109 | 0.1443 | 2.086  | 0.03698  | 0.12833  |
| ENSG00000114353 | GNAI2   | 15914.39 | 107.63 | 96.692 | 105.51 | 121.59 | 108.9  | 117.04 | 0.10446 | 0.0682 | 1.532  | 0.1256   | 0.30283  |
| ENSG00000084207 | GSTP1   | 9154.413 | 486.67 | 401.4  | 423.01 | 721.19 | 588.79 | 722.79 | 0.62769 | 0.1036 | 6.059  | 1.37E-09 | 4.49E-08 |
| ENSG00000019991 | HGF     | 19063.77 | 57.714 | 58.923 | 54.368 | 59.022 | 65.394 | 65.125 | 0.06524 | 0.0749 | 0.871  | 0.38397  | 0.61239  |
| ENSG00000100644 | HIF1A   | 39209.65 | 412.45 | 421.38 | 372.01 | 387.39 | 419.81 | 440.25 | -0.1453 | 0.1033 | -1.407 | 0.15948  | 0.35414  |
| ENSG00000205581 | HMGNI   | 2156.672 | 97.69  | 104.13 | 88.098 | 28.038 | 33.596 | 30.383 | -1.7367 | 0.0975 | -17.82 | 5.18E-71 | 5.62E-68 |
| ENSG00000100292 | HMOX1   | 3620.209 | 110.42 | 104.8  | 115.86 | 230.23 | 210.18 | 186.88 | 0.9622  | 0.1457 | 6.606  | 3.96E-11 | 1.68E-09 |
| ENSG00000232357 | HSD17B8 | 117.0889 | 1.6782 | 1.6882 | 2.2023 | 1.1121 | 0.905  | 1.1937 | -0.6839 | 0.2685 | -2.548 | 0.01085  | 0.05058  |
| ENSG00000160888 | IER2    | 1413.369 | 6.6349 | 6.8412 | 6.7135 | 7.2687 | 6.5693 | 7.0837 | -0.0622 | 0.0929 | -0.669 | 0.50323  | 0.71279  |
| ENSG00000137331 | IER3    | 2020.457 | 33.159 | 30.786 | 26.01  | 31.299 | 36.484 | 33.685 | -0.0252 | 0.1909 | -0.132 | 0.89515  | 0.95101  |

|                 |        |          |        |        |        |        |        |        |         |        |        |          |          |
|-----------------|--------|----------|--------|--------|--------|--------|--------|--------|---------|--------|--------|----------|----------|
| ENSG00000137959 | IFI44L | 14684.03 | 194.13 | 217.17 | 191.96 | 186.05 | 204.48 | 176.33 | -0.1176 | 0.097  | -1.212 | 0.22536  | 0.44099  |
| ENSG00000115008 | IL1A   | 221.843  | 5.9995 | 7.325  | 5.7355 | 2.3738 | 2.9997 | 4.3182 | -1.1577 | 0.2444 | -4.738 | 2.2E-06  | 3.8E-05  |
| ENSG00000125538 | IL1B   | 867.0515 | 22.684 | 19.781 | 19.918 | 10.613 | 8.1291 | 15.95  | -1.0313 | 0.4615 | -2.235 | 0.02543  | 0.09753  |
| ENSG00000136689 | IL1RN  | 4.485481 | 1.3428 | 1.5886 | 1.8582 | 0.6814 | 0.5836 | 0.9742 | -1.2168 | 0.3054 | -3.985 | 6.8E-05  | 0.00077  |
| ENSG00000137033 | IL33   | 19176.52 | 95.353 | 91.218 | 85.835 | 45.581 | 51.698 | 76.026 | -1.081  | 0.3863 | -2.799 | 0.00513  | 0.02823  |
| ENSG00000136244 | IL6    | 7981.845 | 1005.4 | 920.99 | 942.63 | 450.24 | 444.63 | 681.61 | -1.0232 | 0.2798 | -3.656 | 0.00026  | 0.00238  |
| ENSG00000125347 | IRF1   | 1764.448 | 29.58  | 28.713 | 26.699 | 22.523 | 22.636 | 22.167 | -0.4025 | 0.0722 | -5.575 | 2.47E-08 | 6.6E-07  |
| ENSG00000168310 | IRF2   | 1570.984 | 59.687 | 62.83  | 53.347 | 55.669 | 56.824 | 59.3   | -0.0378 | 0.0918 | -0.411 | 0.68074  | 0.83347  |
| ENSG00000185507 | IRF7   | 595.9928 | 23.298 | 25.076 | 26.014 | 36.335 | 34.002 | 26.306 | 0.33057 | 0.1364 | 2.423  | 0.01539  | 0.06661  |
| ENSG00000171223 | JUNB   | 4238.344 | 16.28  | 17.875 | 17.421 | 15.056 | 17.859 | 15.044 | -0.1851 | 0.084  | -2.204 | 0.0275   | 0.10309  |
| ENSG00000172037 | LAMB2  | 19484.23 | 546.26 | 479.2  | 571.69 | 612.11 | 615.7  | 591.97 | 0.15539 | 0.0747 | 2.079  | 0.03761  | 0.12997  |
| ENSG00000101670 | LIPG   | 966.9517 | 22.451 | 21.726 | 21.28  | 14.543 | 14.96  | 19.491 | -0.4822 | 0.1231 | -3.917 | 9E-05    | 0.00097  |
| ENSG00000110492 | MDK    | 11467.43 | 219.15 | 212.77 | 225.26 | 247.86 | 229.54 | 235.39 | 0.11709 | 0.0877 | 1.335  | 0.18186  | 0.38532  |
| ENSG00000196611 | MMP1   | 144075.8 | 1024.6 | 1056.5 | 974.5  | 756.83 | 797.44 | 937.23 | -0.452  | 0.1224 | -3.694 | 0.00022  | 0.0021   |
| ENSG00000149968 | MMP3   | 248.4587 | 73.056 | 75.186 | 68.724 | 31.682 | 45.925 | 61.201 | -0.9973 | 0.4092 | -2.437 | 0.01481  | 0.06459  |
| ENSG00000100985 | MMP9   | 0.389481 | 0.0056 | 0      | 0      | 0      | 0      | 0      | -1.0573 | 3.5258 | -0.3   | 0.76427  | NA       |
| ENSG00000157601 | MX1    | 30682.87 | 1214.4 | 1359.8 | 1191   | 1340.6 | 1474.1 | 1280.6 | 0.08785 | 0.1139 | 0.772  | 0.44034  | 0.66159  |
| ENSG00000136997 | MYC    | 2281.403 | 27.67  | 29.465 | 30.53  | 22.976 | 21.885 | 18.912 | -0.3907 | 0.1231 | -3.174 | 0.0015   | 0.01041  |
| ENSG00000109320 | NFKB1  | 3099.801 | 17.626 | 19.018 | 19.728 | 17.382 | 18.361 | 17.679 | -0.1276 | 0.0825 | -1.547 | 0.12189  | 0.29737  |
| ENSG00000077150 | NFKB2  | 604.7963 | 5.7012 | 7.9419 | 8.2491 | 5.4339 | 6.5593 | 4.9531 | -0.567  | 0.2106 | -2.692 | 0.00711  | 0.03645  |
| ENSG00000100906 | NFKBIA | 5156.267 | 420.97 | 440.18 | 452.01 | 315.94 | 324.2  | 303.14 | -0.5302 | 0.0716 | -7.404 | 1.32E-13 | 7.83E-12 |
| ENSG00000144802 | NFKBIZ | 6311.337 | 61.968 | 61.681 | 64.187 | 46.466 | 46.503 | 50.402 | -0.4884 | 0.1128 | -4.328 | 1.5E-05  | 0.00021  |
| ENSG00000181019 | NQO1   | 9735.703 | 244.09 | 252.23 | 242.51 | 201.12 | 204.2  | 180.96 | -0.3731 | 0.0928 | -4.022 | 5.8E-05  | 0.00067  |
| ENSG00000113580 | NR3C1  | 10010.13 | 41.899 | 40.555 | 39.47  | 36.266 | 36.721 | 36.082 | -0.1716 | 0.0612 | -2.803 | 0.00507  | 0.02796  |
| ENSG00000163545 | NUAK2  | 299.2818 | 2.1201 | 2.0603 | 2.1989 | 1.5846 | 1.4108 | 1.6436 | -0.4241 | 0.131  | -3.238 | 0.0012   | 0.00863  |
| ENSG00000125618 | PAX8   | 43.3861  | 3.409  | 2.763  | 3.3348 | 2.0966 | 2.529  | 1.5579 | -0.5281 | 0.2496 | -2.116 | 0.03437  | 0.12138  |
| ENSG00000205268 | PDE7A  | 602.678  | 2.8342 | 2.5994 | 2.4125 | 2.9988 | 3.3703 | 3.5247 | 0.18543 | 0.1199 | 1.546  | 0.12211  | 0.29747  |
| ENSG00000181195 | PENK   | 109.9003 | 8.6845 | 8.1586 | 10.719 | 6.9244 | 6.5481 | 7.4327 | -0.3684 | 0.1626 | -2.265 | 0.0235   | 0.09194  |
| ENSG00000151665 | PIGF   | 505.7534 | 14.318 | 13.433 | 13.944 | 11.922 | 13.899 | 13.564 | -0.1569 | 0.1167 | -1.345 | 0.17878  | 0.38149  |
| ENSG00000121879 | PIK3CA | 1929.034 | 10.261 | 10.626 | 9.8595 | 9.3465 | 9.4451 | 8.5491 | 0.04967 | 0.1812 | 0.274  | 0.78397  | 0.89465  |
| ENSG00000137193 | PIM1   | 1340.825 | 5.4811 | 4.9285 | 5.9941 | 9.1267 | 7.7186 | 6.8491 | 0.54516 | 0.1639 | 3.326  | 0.00088  | 0.00666  |
| ENSG00000173846 | PLK3   | 1218.008 | 13.183 | 10.211 | 12.479 | 14.573 | 14.612 | 17.634 | 0.24146 | 0.1645 | 1.467  | 0.14225  | 0.32953  |
| ENSG00000011485 | PPP5C  | 2095.164 | 40.285 | 43.857 | 43.08  | 41.304 | 44.354 | 47.236 | -0.0739 | 0.0878 | -0.841 | 0.40027  | 0.62804  |
| ENSG00000072062 | PRKACA | 4864.75  | 33.944 | 30.05  | 33.346 | 32.874 | 30.713 | 35.407 | -0.0472 | 0.0785 | -0.601 | 0.5477   | 0.74636  |
| ENSG00000163932 | PRKCD  | 930.9193 | 5.1282 | 5.1881 | 5.2748 | 5.0007 | 5.396  | 5.7397 | -0.0138 | 0.0892 | -0.155 | 0.87704  | 0.94305  |
| ENSG00000240508 | PSMB9  | 639.17   | 37.454 | 36.468 | 38.27  | 30.147 | 29.507 | 26.015 | -0.297  | 0.1053 | -2.82  | 0.0048   | 0.02676  |
| ENSG00000092010 | PSME1  | 5681.536 | 235.77 | 269.22 | 238.37 | 219.88 | 216.66 | 218.76 | 0.1231  | 0.0559 | 2.204  | 0.02756  | 0.10323  |

|                 |          |          |        |        |        |        |        |        |         |        |        |          |          |
|-----------------|----------|----------|--------|--------|--------|--------|--------|--------|---------|--------|--------|----------|----------|
| ENSG00000100911 | PSME2    | 4957.698 | 235.77 | 269.22 | 238.37 | 219.88 | 216.66 | 218.76 | -0.2685 | 0.0602 | -4.462 | 8.1E-06  | 0.00012  |
| ENSG00000284792 | PTEN     | 2914.126 | 55.953 | 72.374 | 52.654 | 54.936 | 59.276 | 49.258 | 0.09887 | 0.1052 | 0.94   | 0.34718  | 0.57708  |
| ENSG00000148344 | PTGES    | 1119.289 | 28.805 | 28.978 | 28.13  | 14.973 | 16.44  | 22.056 | -0.7644 | 0.1467 | -5.209 | 1.9E-07  | 4.2E-06  |
| ENSG00000124212 | PTGIS    | 40278.13 | 36.9   | 35.424 | 38.495 | 59.649 | 55.235 | 48.942 | 0.56426 | 0.1238 | 4.557  | 5.2E-06  | 8.2E-05  |
| ENSG00000073756 | PTGS2    | 6602.426 | 59.489 | 62.358 | 50.258 | 28.662 | 31.208 | 57.444 | -0.9463 | 0.5064 | -1.869 | 0.06167  | 0.18554  |
| ENSG00000087494 | PTHLH    | 171.7922 | 6.7677 | 6.0686 | 5.3625 | 3.8145 | 2.4992 | 4.4807 | -1.2016 | 0.3726 | -3.225 | 0.00126  | 0.00898  |
| ENSG00000196396 | PTPN1    | 2439.5   | 13.757 | 13.638 | 13.564 | 12.62  | 12.785 | 13.116 | -0.1673 | 0.0528 | -3.171 | 0.00152  | 0.01048  |
| ENSG00000163629 | PTPN13   | 3902.703 | 6.6724 | 6.9435 | 7.5762 | 7.8825 | 11.607 | 11.856 | 0.5565  | 0.1321 | 4.213  | 2.5E-05  | 0.00033  |
| ENSG00000103490 | PYCARD   | 691.27   | 5.9867 | 6.8887 | 8.3941 | 10.919 | 10.618 | 10.888 | 0.5801  | 0.1757 | 3.302  | 0.00096  | 0.00718  |
| ENSG00000162521 | RBBP4    | 4217.928 | 50.099 | 60.046 | 52.283 | 51.764 | 50.224 | 50.226 | -0.087  | 0.0896 | -0.971 | 0.33131  | 0.56099  |
| ENSG00000173039 | RELA     | 3421.807 | 135.5  | 186.41 | 144.66 | 161.12 | 187.23 | 121.06 | 0.09544 | 0.1647 | 0.579  | 0.56229  | 0.75544  |
| ENSG00000104856 | RELB     | 976.8408 | 7.9245 | 8.5195 | 6.8063 | 7.117  | 5.588  | 8.1144 | -0.217  | 0.1704 | -1.273 | 0.20296  | 0.41273  |
| ENSG00000009413 | REV3L    | 5791.711 | 59.726 | 61.693 | 54.053 | 50.116 | 58.817 | 51.596 | -0.1816 | 0.0942 | -1.927 | 0.05403  | 0.16846  |
| ENSG00000104312 | RIPK2    | 1772.162 | 20.869 | 22.599 | 19.769 | 15.246 | 16.909 | 16.981 | -0.4565 | 0.0842 | -5.42  | 5.96E-08 | 1.5E-06  |
| ENSG00000196154 | S100A4   | 8444.56  | 87.481 | 67.861 | 87.605 | 114.8  | 102.96 | 137.47 | 0.35918 | 0.1508 | 2.381  | 0.01726  | 0.07261  |
| ENSG00000197956 | S100A6   | 43535.37 | 1010   | 894.91 | 1036.4 | 1258.1 | 1136.7 | 1329.4 | 0.26897 | 0.0897 | 2.998  | 0.00272  | 0.0169   |
| ENSG00000130066 | SAT1     | 13963.76 | 386.8  | 447.16 | 392.98 | 290.06 | 309.48 | 348.55 | -0.5528 | 0.1272 | -4.348 | 1.4E-05  | 0.00019  |
| ENSG00000196136 | SERPINA3 | 682.5698 | 10.531 | 9.231  | 10.277 | 10.299 | 9.1077 | 9.8182 | -0.0012 | 0.1384 | -0.009 | 0.99294  | 0.99727  |
| ENSG00000021355 | SERPINB1 | 1251.455 | 33.167 | 37.537 | 29.359 | 50.309 | 56.485 | 42.399 | 0.40931 | 0.1256 | 3.26   | 0.00112  | 0.00814  |
| ENSG00000106366 | SERPINE1 | 32056.27 | 555.39 | 536.76 | 529.21 | 249.74 | 245.99 | 299.85 | -1.07   | 0.1181 | -9.062 | 1.28E-19 | 1.47E-17 |
| ENSG00000135919 | SERPINE2 | 72012.2  | 3087.9 | 2954.4 | 2931.8 | 2711.2 | 2697.2 | 3053.5 | -0.1815 | 0.0852 | -2.129 | 0.03324  | 0.11874  |
| ENSG00000145604 | SKP2     | 395.4459 | 7.5409 | 7.7076 | 7.7448 | 6.851  | 5.0107 | 4.7658 | -0.4614 | 0.1655 | -2.788 | 0.00531  | 0.02898  |
| ENSG00000110911 | SLC11A2  | 3689.193 | 78.504 | 77.499 | 72.744 | 61.837 | 63.901 | 75.356 | -0.2793 | 0.0951 | -2.936 | 0.00333  | 0.0198   |
| ENSG00000155380 | SLC16A1  | 5495.062 | 30.738 | 34.884 | 30.447 | 43.521 | 43.227 | 39.306 | 0.40305 | 0.0962 | 4.189  | 2.8E-05  | 0.00036  |
| ENSG00000168003 | SLC3A2   | 6047.854 | 575.73 | 532.38 | 533.42 | 411.19 | 414.37 | 402.06 | -0.4213 | 0.0706 | -5.97  | 2.37E-09 | 7.57E-08 |
| ENSG00000124216 | SNAI1    | 1141.099 | 3.7721 | 3.4943 | 4.1006 | 3.6654 | 3.7183 | 3.4263 | -0.1811 | 0.176  | -1.029 | 0.30325  | 0.53126  |
| ENSG00000111728 | ST8SIA1  | 184.465  | 1.1441 | 1.2952 | 1.1193 | 1.9822 | 1.8341 | 1.6481 | 0.7195  | 0.2038 | 3.53   | 0.00041  | 0.00358  |
| ENSG00000126561 | STAT5A   | 683.4394 | 5.8824 | 5.6799 | 6.4949 | 6.2949 | 6.0604 | 6.2045 | 0.00497 | 0.1006 | 0.049  | 0.96057  | 0.98102  |
| ENSG00000156502 | SUPV3L1  | 950.7204 | 32.643 | 32.525 | 30.714 | 28.104 | 28.19  | 24.728 | -0.3274 | 0.0759 | -4.315 | 1.6E-05  | 0.00022  |
| ENSG00000168394 | TAP1     | 2486.759 | 72.212 | 69.223 | 71.631 | 64.048 | 59.004 | 61.065 | -0.2777 | 0.056  | -4.961 | 7E-07    | 1.4E-05  |
| ENSG00000236490 | TAPBP    | 2561.25  | 36.389 | 37.354 | 39.895 | 49.864 | 45.347 | 42.143 | -0.1481 | 0.1041 | -1.422 | 0.1549   | 0.3476   |
| ENSG00000105967 | TFEC     | 5.35072  | 0.6572 | 0.8015 | 0.7341 | 0.2984 | 0.272  | 0.1715 | -1.8433 | 0.4194 | -4.395 | 1.1E-05  | 0.00016  |
| ENSG00000137801 | THBS1    | 27699.25 | 110.39 | 112.25 | 105.71 | 92.387 | 94.389 | 97.787 | -0.2555 | 0.0843 | -3.031 | 0.00244  | 0.01543  |
| ENSG00000186340 | THBS2    | 34675.45 | 203.29 | 172.72 | 193.87 | 258.86 | 240.03 | 245.17 | 0.34693 | 0.0761 | 4.557  | 5.2E-06  | 8.2E-05  |
| ENSG00000041982 | TNC      | 38265.62 | 314.5  | 314.79 | 326.3  | 380.92 | 385.35 | 511.8  | 0.37565 | 0.117  | 3.21   | 0.00133  | 0.00938  |
| ENSG00000230108 | TNF      | 11.43641 | 0.0656 | 0.0164 | 0.0921 | 0.0182 | 0.0609 | 0      | NA      | NA     | NA     | NA       | NA       |
| ENSG00000185215 | TNFAIP2  | 12840.35 | 264.2  | 286.09 | 305.69 | 156.71 | 139.11 | 153.54 | -0.9284 | 0.0847 | -10.96 | 5.97E-28 | 1.49E-25 |

|                 |          |          |        |        |        |        |        |        |         |        |        |          |          |
|-----------------|----------|----------|--------|--------|--------|--------|--------|--------|---------|--------|--------|----------|----------|
| ENSG00000118503 | TNFAIP3  | 5808.19  | 72.8   | 77.913 | 72.903 | 47.757 | 50.803 | 55.482 | -0.6594 | 0.0926 | -7.124 | 1.05E-12 | 5.60E-11 |
| ENSG00000121858 | TNFSF10  | 2005.559 | 98.681 | 102.57 | 89.328 | 70.379 | 70.572 | 56.422 | -0.5567 | 0.2012 | -2.767 | 0.00566  | 0.03041  |
| ENSG00000102524 | TNFSF13B | 585.8452 | 86.066 | 89.897 | 83.128 | 77.934 | 84.09  | 67.141 | -0.218  | 0.1409 | -1.547 | 0.12193  | 0.29737  |
| ENSG00000181634 | TNFSF15  | 102.9641 | 0.4199 | 0.3959 | 0.4157 | 0.2264 | 0.237  | 0.2219 | -0.885  | 0.1719 | -5.148 | 2.6E-07  | 5.6E-06  |
| ENSG00000050730 | TNIP3    | 11.41582 | 3.8513 | 5.5199 | 4.4812 | 0.9097 | 1.0282 | 0.6591 | -2.3379 | 0.223  | -10.48 | 1.02E-25 | 2.04E-23 |
| ENSG00000141510 | TP53     | 2881.632 | 117.36 | 134.1  | 132.62 | 157.03 | 157.79 | 156.92 | 0.32566 | 0.2451 | 1.329  | 0.18388  | 0.38802  |
| ENSG00000056558 | TRAF1    | 600.1565 | 1.2242 | 1.2519 | 1.1548 | 1.141  | 1.1484 | 1.1335 | -0.216  | 0.1136 | -1.901 | 0.05727  | 0.17586  |
| ENSG00000124731 | TREM1    | 5.677793 | 9.0865 | 8.2976 | 8.3201 | 3.8542 | 4.7299 | 5.4343 | -1.0071 | 0.2329 | -4.324 | 1.5E-05  | 0.00021  |
| ENSG00000130725 | UBE2M    | 2259.242 | 99.588 | 91.898 | 113.81 | 118.92 | 103.79 | 108.59 | 0.0841  | 0.1061 | 0.792  | 0.42821  | 0.65092  |
| ENSG00000162692 | VCAM1    | 6258.808 | 38.011 | 42.514 | 38.524 | 42.393 | 42.691 | 35.333 | 0.0265  | 0.2144 | 0.124  | 0.90162  | 0.9541   |
| ENSG00000150630 | VEGFC    | 1530.309 | 21.076 | 22.752 | 20.996 | 18.651 | 21.949 | 20.88  | -0.1596 | 0.0811 | -1.967 | 0.04921  | 0.15755  |
| ENSG00000026025 | VIM      | 172218.1 | 727.66 | 747.19 | 728.32 | 750.45 | 754.11 | 744.25 | -0.0307 | 0.0328 | -0.938 | 0.3481   | 0.57779  |
| ENSG00000100811 | YY1      | 4640.467 | 49.931 | 48.101 | 44.17  | 45.454 | 46.431 | 41.248 | -0.2383 | 0.0838 | -2.844 | 0.00445  | 0.02515  |



**Supplemental Table V: RNA-seq analysis of the NF- $\kappa$ B target genes in HASMCs**

**Supplemental Table Vb: RNA-seq analysis of the NF- $\kappa$ B target genes in HASMCs infected with AdGFP or AdBAF60a**

| gene_ensembl_id | gene_name | baseMean  | TPM_<br>AdGFP<br>_1 | TPM_<br>AdGFP<br>_2 | TPM_<br>AdGFP<br>_3 | TPM_<br>AdBAF<br>60a 1 | TPM_<br>AdBAF<br>60a 2 | TPM_<br>AdBAF<br>60a 3 | log2Fold<br>Change | lfcSE   | stat     | p value | p adj   |
|-----------------|-----------|-----------|---------------------|---------------------|---------------------|------------------------|------------------------|------------------------|--------------------|---------|----------|---------|---------|
| ENSG00000165029 | ABCA1     | 1389.0658 | 6.2671              | 7.5542              | 7.244               | 7.8698                 | 8                      | 7.1179                 | 0.152508           | 0.11265 | 1.3538   | 0.1758  | 0.32869 |
| ENSG00000081051 | AFP       | 8.7728116 | 0.6985              | 0.4481              | 0.8077              | 0.9952                 | 1.757                  | 1.8566                 | 1.268497           | 0.72854 | 1.74115  | 0.08166 | 0.18292 |
| ENSG00000153207 | AHCTF1    | 1598.0733 | 13.009              | 14.794              | 15.907              | 11.048                 | 9.899                  | 10.469                 | -0.4479            | 0.10227 | -4.37938 | 1.2E-05 | 7.7E-05 |
| ENSG00000187134 | AKR1C1    | 20008.196 | 1189.5              | 1224.5              | 1204.4              | 969.67                 | 967.4                  | 938.19                 | -0.30458           | 0.03772 | -8.07568 | 6.7E-16 | 1.2E-14 |
| ENSG00000242110 | AMACR     | 458.75977 | 12.715              | 14.086              | 12.024              | 16.648                 | 18.67                  | 18.642                 | 0.498514           | 0.11144 | 4.47324  | 7.7E-06 | 5.1E-05 |
| ENSG00000154188 | ANGPT1    | 736.62927 | 10.13               | 11.425              | 11.586              | 15.762                 | 16.683                 | 15.51                  | 0.558202           | 0.0981  | 5.69035  | 1.3E-08 | 1.3E-07 |
| ENSG00000101246 | ARFRP1    | 1808.0742 | 58.491              | 56.842              | 55.516              | 65.925                 | 62.298                 | 64.174                 | 0.198934           | 0.08511 | 2.3373   | 0.01942 | 0.05648 |
| ENSG00000198363 | ASPH      | 18567.756 | 357.73              | 359.78              | 355.5               | 379.65                 | 378.49                 | 371.27                 | 0.101011           | 0.03266 | 3.09266  | 0.00198 | 0.00796 |
| ENSG00000130707 | ASS1      | 627.57019 | 16.448              | 15.904              | 16.084              | 34.199                 | 31.212                 | 29.99                  | 1.007795           | 0.09844 | 10.2377  | 1.3E-24 | 4.1E-23 |
| ENSG00000166710 | B2M       | 16981.93  | 1156.9              | 1170.2              | 1178.4              | 2474.1                 | 2276.9                 | 2027.8                 | 0.978141           | 0.0785  | 12.4606  | 1.2E-35 | 5.7E-34 |
| ENSG00000087088 | BAX       | 386.92328 | 64.752              | 46.268              | 70.085              | 46.384                 | 61.136                 | 41.074                 | -0.25987           | 0.23424 | -1.10943 | 0.26724 | 0.44442 |
| ENSG00000140379 | BCL2A1    | 38.342681 | 2.0121              | 3.0566              | 2.0806              | 3.2479                 | 3.7093                 | 4.0763                 | 0.639373           | 0.43061 | 1.48479  | 0.1376  | 0.27437 |
| ENSG00000171552 | BCL2L1    | 2058.1623 | 42.914              | 44.949              | 42.341              | 66.509                 | 69.594                 | 66.5                   | 0.663574           | 0.0557  | 11.9136  | 1E-32   | 4.3E-31 |
| ENSG00000100739 | BDKRB1    | 29.04623  | 1.6014              | 0.3704              | 1.7159              | 0.5042                 | 5.0458                 | 1.63                   | 0.972356           | 1.06168 | 0.91587  | 0.35974 | 0.5439  |
| ENSG00000176697 | BDNF      | 1151.1479 | 19.484              | 19.961              | 19.224              | 15.306                 | 15.359                 | 13.282                 | -0.38997           | 0.07588 | -5.1391  | 2.8E-07 | 2.3E-06 |
| ENSG00000182492 | BGN       | 31159.278 | 582.47              | 598.44              | 573.7               | 784.54                 | 808.08                 | 825.3                  | 0.489741           | 0.04335 | 11.2974  | 1.4E-29 | 5E-28   |
| ENSG00000125378 | BMP4      | 224.74895 | 7.0713              | 7.4271              | 7.4878              | 8.0855                 | 6.7951                 | 7.2518                 | 0.040702           | 0.14352 | 0.2836   | 0.77672 | 0.87659 |
| ENSG00000176171 | BNIP3     | 5703.6581 | 117.45              | 118.97              | 112.85              | 198.64                 | 233.25                 | 189.27                 | 0.857219           | 0.07376 | 11.6214  | 3.2E-31 | 1.3E-29 |
| ENSG00000105974 | CAV1      | 4902.3049 | 150.63              | 145.52              | 154.65              | 126.69                 | 128.61                 | 118.7                  | -0.24214           | 0.04878 | -4.96409 | 6.9E-07 | 5.4E-06 |
| ENSG00000108691 | CCL2      | 531.42124 | 128.13              | 123.81              | 123.35              | 41.378                 | 39.373                 | 36.505                 | -1.64932           | 0.10395 | -15.8672 | 1.1E-56 | 9.6E-55 |
| ENSG00000115009 | CCL20     | 5.1130612 | 1.534               | 0.1192              | 0.761               | 1.0845                 | 1.3896                 | 0.6311                 | 0.565579           | 1.05065 | 0.53831  | 0.59036 | 0.74807 |
| ENSG00000271503 | CCL5      | 80.393134 | 2.5447              | 1.6308              | 2.9987              | 5.3644                 | 2.9029                 | 4.3659                 | 0.867255           | 0.3187  | 2.7212   | 0.0065  | 0.02239 |
| ENSG00000108688 | CCL7      | 3.3370157 | 0                   | 0                   | 0.4497              | 0.0983                 | 0.4053                 | 0.2434                 | 0.765265           | 1.49715 | 0.51115  | 0.60925 | 0.76223 |
| ENSG00000108700 | CCL8      | 0.9898256 | 0                   | 0                   | 0                   | 0.0452                 | 0                      | 0.1668                 | 2.586505           | 2.45151 | 1.05506  | 0.2914  | NA      |
| ENSG00000110092 | CCND1     | 48253.66  | 791.58              | 812.78              | 792.43              | 605.7                  | 563.03                 | 574.03                 | -0.43277           | 0.08534 | -5.07111 | 4E-07   | 3.2E-06 |
| ENSG00000120217 | CD274     | 77.429235 | 0.4728              | 2.0268              | 1.5531              | 3.6402                 | 2.3641                 | 1.3941                 | 0.923199           | 0.49681 | 1.85826  | 0.06313 | 0.14954 |
| ENSG00000004468 | CD38      | 4.7282032 | 0                   | 0.0239              | 0                   | 0.1024                 | 0.3767                 | 0.1498                 | 3.927011           | 1.3813  | 2.84298  | 0.00447 | 0.01614 |
| ENSG00000101017 | CD40      | 104.21128 | 2.7306              | 3.0322              | 2.1049              | 5.708                  | 5.7304                 | 6.9784                 | 1.251284           | 0.23683 | 5.28342  | 1.3E-07 | 1.1E-06 |
| ENSG00000026508 | CD44      | 6752.0615 | 503.91              | 516.86              | 533.37              | 476.41                 | 477.02                 | 434.77                 | -0.13573           | 0.07484 | -1.81347 | 0.06976 | 0.16176 |
| ENSG00000124762 | CDKN1A    | 16768.799 | 315.82              | 311.18              | 307.98              | 496.15                 | 530.99                 | 532.21                 | 0.765052           | 0.04447 | 17.2024  | 2.5E-66 | 2.8E-64 |

|                 |         |           |        |        |        |        |        |        |          |         |          |         |         |
|-----------------|---------|-----------|--------|--------|--------|--------|--------|--------|----------|---------|----------|---------|---------|
| ENSG00000221869 | CEBPD   | 408.74109 | 7.9614 | 7.8769 | 7.9144 | 11.506 | 12.671 | 10.614 | 0.577433 | 0.12021 | 4.80359  | 1.6E-06 | 1.2E-05 |
| ENSG00000003402 | CFLAR   | 1388.1735 | 21.127 | 21.724 | 21.218 | 23.147 | 20.781 | 23.971 | 0.110709 | 0.11208 | 0.98776  | 0.32327 | 0.50746 |
| ENSG00000133048 | CHI3L1  | 1.9768057 | 0      | 0      | 0.035  | 0.0492 | 0.505  | 0.0606 | 3.683096 | 2.03675 | 1.80832  | 0.07056 | 0.16311 |
| ENSG00000164692 | COL1A2  | 341255.43 | 2948.5 | 3053.5 | 2843.2 | 4155.4 | 3786.3 | 4054.1 | 0.466406 | 0.05281 | 8.83211  | 1E-18   | 2.3E-17 |
| ENSG00000107175 | CREB3   | 3063.9895 | 85.242 | 82.296 | 81.387 | 110.98 | 111.19 | 110.68 | 0.44714  | 0.05207 | 8.58713  | 8.9E-18 | 1.9E-16 |
| ENSG00000184371 | CSF1    | 71.576553 | 8.5443 | 7.4915 | 2.4526 | 4.1903 | 11.269 | 6.7888 | 0.28328  | 0.47143 | 0.6009   | 0.54791 | 0.71372 |
| ENSG00000108342 | CSF3    | 12.424773 | 0.4553 | 0.2669 | 0.2971 | 0.5286 | 0.4672 | 0.2565 | 0.358687 | 0.66102 | 0.54263  | 0.58739 | 0.74577 |
| ENSG00000164733 | CTSB    | 23061.937 | 760.3  | 805.65 | 762.22 | 879.82 | 895.75 | 883.15 | 0.218702 | 0.05    | 4.37432  | 1.2E-05 | 7.8E-05 |
| ENSG00000163739 | CXCL1   | 243.48916 | 17.924 | 18.314 | 20.501 | 19.728 | 19.977 | 21.728 | 0.141989 | 0.17175 | 0.82671  | 0.4084  | 0.59155 |
| ENSG00000169245 | CXCL10  | 8.7114562 | 0      | 0      | 0.0754 | 1.2884 | 1.2781 | 1.0548 | 5.486829 | 1.33572 | 4.10776  | 4E-05   | 0.00023 |
| ENSG00000169248 | CXCL11  | 9.677618  | 0      | 0      | 0.1164 | 1.7438 | 1.0942 | 1.0184 | 5.05401  | 1.25079 | 4.04065  | 5.3E-05 | 0.00031 |
| ENSG00000163734 | CXCL3   | 28.003646 | 0.404  | 0.656  | 1.9835 | 2.6889 | 3.1199 | 2.749  | 1.531652 | 0.5404  | 2.83432  | 0.00459 | 0.01652 |
| ENSG00000163735 | CXCL5   | 38.86437  | 1.6785 | 1.5775 | 1.9309 | 0.6761 | 1.2074 | 0.9109 | -0.87747 | 0.34764 | -2.52407 | 0.0116  | 0.03672 |
| ENSG00000124875 | CXCL6   | 261.37569 | 18.434 | 17.468 | 18.294 | 9.6165 | 8.9829 | 8.0106 | -0.99641 | 0.14679 | -6.7879  | 1.1E-11 | 1.5E-10 |
| ENSG00000169429 | CXCL8   | 1877.1695 | 164.66 | 165.13 | 167.9  | 72.594 | 76.72  | 72.113 | -1.14153 | 0.11023 | -10.3556 | 3.9E-25 | 1.2E-23 |
| ENSG00000132912 | DCTN4   | 2450.6178 | 42.143 | 42.664 | 45.295 | 47.907 | 48.949 | 46.241 | 0.164326 | 0.05803 | 2.83152  | 0.00463 | 0.01665 |
| ENSG00000211448 | DIO2    | 6589.7128 | 205.86 | 193.44 | 217.13 | 167.08 | 185.36 | 172.87 | -0.2036  | 0.10272 | -1.98205 | 0.04747 | 0.11872 |
| ENSG00000188641 | DPYD    | 857.00089 | 14.823 | 15.135 | 15.004 | 17.466 | 15.664 | 17.4   | 0.19634  | 0.117   | 1.6781   | 0.09333 | 0.20303 |
| ENSG00000120129 | DUSP1   | 573.50239 | 5.3238 | 5.962  | 5.1779 | 14.262 | 10.956 | 10.798 | 1.156533 | 0.14057 | 8.22743  | 1.9E-16 | 3.7E-15 |
| ENSG00000146648 | EGFR    | 3259.253  | 28.902 | 31.595 | 29.71  | 20.568 | 18.613 | 19.197 | -0.6002  | 0.06493 | -9.24449 | 2.4E-20 | 5.8E-19 |
| ENSG00000120738 | EGR1    | 590.10731 | 0.9602 | 0.8238 | 1.029  | 16.421 | 12.107 | 13.203 | 3.928139 | 0.19441 | 20.2049  | 8.9E-91 | 1.8E-88 |
| ENSG00000111674 | ENO2    | 3712.581  | 64.221 | 62.023 | 65.33  | 95.341 | 103.99 | 108.53 | 0.711819 | 0.06422 | 11.084   | 1.5E-28 | 5.4E-27 |
| ENSG00000070404 | FSTL3   | 6436.327  | 109.86 | 111.2  | 103.89 | 156.2  | 160.23 | 156.13 | 0.56698  | 0.04748 | 11.9405  | 7.3E-33 | 3.1E-31 |
| ENSG00000167996 | FTH1    | 29253.421 | 3485.6 | 3368   | 3405.5 | 3845.7 | 4131.4 | 3886.1 | 0.236533 | 0.04153 | 5.69565  | 1.2E-08 | 1.2E-07 |
| ENSG00000160211 | G6PD    | 8697.5759 | 218.06 | 223.55 | 222.18 | 264.69 | 266.5  | 276.5  | 0.310315 | 0.05787 | 5.36249  | 8.2E-08 | 7.2E-07 |
| ENSG00000099860 | GADD45B | 1239.0464 | 34.48  | 35.601 | 34.468 | 46.37  | 47.034 | 49.76  | 0.479687 | 0.06879 | 6.97274  | 3.1E-12 | 4.4E-11 |
| ENSG00000117228 | GBP1    | 1065.8699 | 3.6049 | 3.3225 | 2.7354 | 40.015 | 34.14  | 30.557 | 3.467774 | 0.14977 | 23.1545  | 1E-118  | 6E-116  |
| ENSG00000001084 | GCLC    | 953.62309 | 20.483 | 19.051 | 18.914 | 18.515 | 18.708 | 20.775 | 0.015651 | 0.11545 | 0.13556  | 0.89217 | 0.9442  |
| ENSG00000023909 | GCLM    | 1433.4634 | 30.266 | 30.844 | 29.169 | 28.174 | 29.745 | 27.572 | -0.0517  | 0.06557 | -0.7885  | 0.43041 | 0.61241 |
| ENSG00000114353 | GNAI2   | 1189.2566 | 69.916 | 72.221 | 73.453 | 70.478 | 72.04  | 72.389 | 0.022631 | 0.11999 | 0.1886   | 0.85041 | 0.92063 |
| ENSG00000084207 | GSTP1   | 9737.9234 | 1078.5 | 1119   | 1048.4 | 1058   | 1047.9 | 1071.4 | -0.00383 | 0.04403 | -0.08707 | 0.93062 | 0.9635  |
| ENSG00000019991 | HGF     | 12145.442 | 294.64 | 331.39 | 340.15 | 268.44 | 252.34 | 260.81 | -0.27811 | 0.06024 | -4.61636 | 3.9E-06 | 2.7E-05 |
| ENSG00000100644 | HIF1A   | 13331.731 | 275.95 | 259.26 | 270.19 | 260.13 | 268.65 | 236.47 | -0.04706 | 0.05617 | -0.83785 | 0.40211 | 0.58506 |
| ENSG00000205581 | HMGN1   | 5042.3694 | 353.78 | 330.23 | 305.13 | 292.66 | 313.02 | 301.5  | -0.09826 | 0.08022 | -1.22497 | 0.22059 | 0.38812 |
| ENSG00000100292 | HMOX1   | 7864.1074 | 171.65 | 182.48 | 169.27 | 227.18 | 253.93 | 233.93 | 0.476836 | 0.06331 | 7.53126  | 5E-14   | 8.2E-13 |
| ENSG00000232357 | HSD17B8 | 61.777708 | 5.3829 | 3.7237 | 4.4049 | 5.2586 | 4.9806 | 3.9299 | 0.102046 | 0.33706 | 0.30275  | 0.76208 | 0.86712 |

|                 |        |           |        |        |        |        |        |        |          |         |          |         |         |
|-----------------|--------|-----------|--------|--------|--------|--------|--------|--------|----------|---------|----------|---------|---------|
| ENSG00000160888 | IER2   | 1513.1988 | 17.038 | 15.481 | 14.128 | 44.811 | 42.865 | 46.317 | 1.551762 | 0.08584 | 18.0778  | 4.8E-73 | 6.2E-71 |
| ENSG00000137331 | IER3   | 0         | 0      | 0      | 0      | 0      | 0      | 0      | NA       | NA      | NA       | NA      | NA      |
| ENSG00000137959 | IFI44L | 1460.2709 | 2.2444 | 1.587  | 2.1785 | 105.08 | 83.43  | 75.817 | 5.513229 | 0.19891 | 27.7174  | 4E-169  | 4E-166  |
| ENSG00000115008 | IL1A   | 143.20119 | 6.0877 | 5.8039 | 6.6055 | 3.8899 | 3.6204 | 3.5571 | -0.71079 | 0.19166 | -3.70853 | 0.00021 | 0.00107 |
| ENSG00000125538 | IL1B   | 546.61126 | 31.228 | 29.226 | 31.477 | 16.641 | 15.485 | 16.062 | -0.90179 | 0.10139 | -8.89419 | 5.9E-19 | 1.3E-17 |
| ENSG00000136689 | IL1RN  | 5.6243113 | 0.1822 | 0.1902 | 0.4182 | 0.3279 | 0.2237 | 0.2864 | 0.197185 | 0.9004  | 0.219    | 0.82665 | 0.90708 |
| ENSG00000137033 | IL33   | 10494.893 | 366.87 | 383.93 | 392.66 | 283.07 | 293.83 | 277.46 | -0.39316 | 0.06911 | -5.68876 | 1.3E-08 | 1.3E-07 |
| ENSG00000136244 | IL6    | 122.9191  | 6.8902 | 6.8933 | 9.7254 | 6.5282 | 4.9929 | 7.0707 | -0.30647 | 0.2531  | -1.21088 | 0.22594 | 0.39487 |
| ENSG00000125347 | IRF1   | 590.9118  | 8.5774 | 10.124 | 12.135 | 25.58  | 29.7   | 27.79  | 1.458107 | 0.12299 | 11.8553  | 2E-32   | 8.5E-31 |
| ENSG00000168310 | IRF2   | 362.92882 | 10.768 | 11.541 | 13.394 | 15.156 | 13.896 | 11.136 | 0.197189 | 0.16265 | 1.21238  | 0.22537 | 0.39412 |
| ENSG00000185507 | IRF7   | 9.3110113 | 0      | 0      | 0.7274 | 1.2975 | 2.1255 | 1.296  | 2.876699 | 1.04267 | 2.75897  | 0.0058  | 0.02025 |
| ENSG00000171223 | JUNB   | 2871.4216 | 37.737 | 40.406 | 38.474 | 88.241 | 90.672 | 90.427 | 1.232672 | 0.0499  | 24.7018  | 1E-134  | 7E-132  |
| ENSG00000172037 | LAMB2  | 17504.585 | 283.44 | 250.41 | 243.79 | 278.23 | 275.57 | 272.59 | 0.114    | 0.07364 | 1.5481   | 0.1216  | 0.25037 |
| ENSG00000101670 | LIPG   | 823.61248 | 29.36  | 26.006 | 25.651 | 14.423 | 13.677 | 13.162 | -0.94346 | 0.09521 | -9.90878 | 3.8E-23 | 1.1E-21 |
| ENSG00000110492 | MDK    | 4171.9433 | 290.4  | 287.72 | 263.32 | 451.03 | 469.05 | 451.4  | 0.731606 | 0.05738 | 12.7492  | 3.1E-37 | 1.6E-35 |
| ENSG00000196611 | MMP1   | 70762.221 | 3301.4 | 3168   | 3277.7 | 1991.3 | 1875.1 | 1989.9 | -0.70811 | 0.05504 | -12.8656 | 7E-38   | 3.6E-36 |
| ENSG00000149968 | MMP3   | 140.73842 | 4.3028 | 3.9739 | 4.4855 | 4.0578 | 4.667  | 3.7938 | -0.00099 | 0.19192 | -0.00518 | 0.99587 | 0.99941 |
| ENSG00000100984 | MMP9   | 3.5605512 | 0      | 0      | 0      | 0.0502 | 0.1644 | 0.1648 | 4.874823 | 1.67385 | 2.91235  | 0.00359 | 0.01331 |
| ENSG00000157601 | MX1    | 8602.536  | 1.5187 | 1.42   | 2.93   | 510.7  | 427.3  | 342.71 | 7.791903 | 0.34604 | 22.5171  | 3E-112  | 1E-109  |
| ENSG00000136997 | MYC    | 391.24849 | 5.6986 | 5.5495 | 7.0581 | 9.9581 | 9.6456 | 10.018 | 0.730226 | 0.12812 | 5.69943  | 1.2E-08 | 1.2E-07 |
| ENSG00000109320 | NFKB1  | 731.35277 | 12.866 | 13.618 | 12.815 | 11.375 | 9.7366 | 10.761 | -0.27356 | 0.0868  | -3.15146 | 0.00162 | 0.00667 |
| ENSG00000077150 | NFKB2  | 407.88653 | 14.613 | 12.657 | 15.694 | 15.496 | 16.495 | 17.256 | 0.225709 | 0.12112 | 1.86347  | 0.0624  | 0.14812 |
| ENSG00000100906 | NFKBIA | 952.63829 | 34.228 | 39.138 | 42.851 | 41.69  | 39.155 | 42.336 | 0.111435 | 0.10043 | 1.10961  | 0.26717 | 0.44434 |
| ENSG00000144802 | NFKBIZ | 412.75178 | 10.398 | 8.5763 | 13.49  | 8.0151 | 7.6638 | 7.7826 | -0.43753 | 0.16516 | -2.64919 | 0.00807 | 0.02695 |
| ENSG00000181019 | NQO1   | 7248.8847 | 354.23 | 341.77 | 348.29 | 593.16 | 579.61 | 573.92 | 0.769949 | 0.0384  | 20.052   | 1.9E-89 | 3.9E-87 |
| ENSG00000113580 | NR3C1  | 3867.9372 | 54.916 | 52.456 | 53.169 | 42.224 | 39.755 | 40.814 | -0.35943 | 0.0789  | -4.55527 | 5.2E-06 | 3.6E-05 |
| ENSG00000163545 | NUAK2  | 49.304308 | 0.1854 | 0.3634 | 0.3693 | 0.6947 | 0.9158 | 0.8972 | 1.431696 | 0.35045 | 4.0853   | 4.4E-05 | 0.00026 |
| ENSG00000125618 | PAX8   | 52.993704 | 1.4751 | 0.924  | 1.4871 | 1.2862 | 1.0176 | 0.9457 | -0.20328 | 0.33192 | -0.61243 | 0.54025 | 0.70717 |
| ENSG00000205268 | PDE7A  | 287.96648 | 7.8333 | 7.1635 | 7.1794 | 5.9834 | 7.0239 | 5.2934 | -0.25179 | 0.17531 | -1.43621 | 0.15094 | 0.29355 |
| ENSG00000181195 | PENK   | 544.99558 | 26.491 | 28.956 | 30.184 | 38.966 | 39.648 | 39.427 | 0.488499 | 0.10002 | 4.88384  | 1E-06   | 7.9E-06 |
| ENSG00000151665 | PIGF   | 116.2769  | 17.171 | 11.099 | 14.222 | 7.8312 | 11.444 | 12.295 | -0.39849 | 0.25527 | -1.56104 | 0.11851 | 0.24548 |
| ENSG00000121879 | PIK3CA | 1291.424  | 25.33  | 16.809 | 23.32  | 20.367 | 18.784 | 16.688 | -0.20202 | 0.17962 | -1.12469 | 0.26072 | 0.43706 |
| ENSG00000137193 | PIM1   | 453.90715 | 18.177 | 13.668 | 17.727 | 8.0494 | 6.0883 | 6.678  | -1.2219  | 0.15495 | -7.88593 | 3.1E-15 | 5.5E-14 |
| ENSG00000173846 | PLK3   | 659.41911 | 8.4133 | 7.5315 | 8.9952 | 19.486 | 17.396 | 22.788 | 1.288699 | 0.1322  | 9.7483   | 1.9E-22 | 5.1E-21 |
| ENSG00000011485 | PPP5C  | 2363.0851 | 79.382 | 82.431 | 79.52  | 58.085 | 58.312 | 58.673 | -0.43632 | 0.05425 | -8.0433  | 8.7E-16 | 1.6E-14 |
| ENSG00000072062 | PRKACA | 5146.1222 | 121.94 | 130.48 | 122.82 | 140.78 | 135.7  | 147.28 | 0.202521 | 0.06245 | 3.2431   | 0.00118 | 0.00505 |

|                 |          |           |        |        |        |        |        |        |          |         |          |         |         |
|-----------------|----------|-----------|--------|--------|--------|--------|--------|--------|----------|---------|----------|---------|---------|
| ENSG00000163932 | PRKCD    | 945.29839 | 20.002 | 17.666 | 19.395 | 25.732 | 24.278 | 25.022 | 0.425484 | 0.09555 | 4.45288  | 8.5E-06 | 5.6E-05 |
| ENSG00000240508 | PSMB9    | 63.624604 | 0      | 1.1323 | 1.6678 | 15.421 | 14.571 | 11.71  | 3.86758  | 0.48711 | 7.93991  | 2E-15   | 3.6E-14 |
| ENSG00000092010 | PSME1    | 110.87596 | 8.5207 | 7.5722 | 8.0458 | 10.089 | 12.388 | 8.2868 | 0.373479 | 0.24667 | 1.51406  | 0.13001 | 0.26307 |
| ENSG00000100911 | PSME2    | 2693.8483 | 102.93 | 96.564 | 96.864 | 422.14 | 327.85 | 352.07 | 1.922439 | 0.09277 | 20.7222  | 2.2E-95 | 5E-93   |
| ENSG00000284792 | PTEN     | 1012.285  | 11.72  | 10.638 | 11.627 | 14.573 | 11.357 | 11.306 | 0.158983 | 0.12632 | 1.25854  | 0.2082  | 0.37255 |
| ENSG00000148344 | PTGES    | 674.08316 | 16.626 | 16.746 | 16.633 | 23.836 | 21.102 | 22.734 | 0.465504 | 0.09573 | 4.86243  | 1.2E-06 | 8.7E-06 |
| ENSG00000124212 | PTGIS    | 8944.6332 | 106.23 | 116.76 | 108.74 | 83.293 | 88.839 | 80.972 | -0.36351 | 0.05483 | -6.6297  | 3.4E-11 | 4.3E-10 |
| ENSG00000073756 | PTGS2    | 3876.2237 | 77.448 | 77.172 | 88.303 | 62.732 | 53.458 | 61.141 | -0.42575 | 0.07299 | -5.83322 | 5.4E-09 | 5.6E-08 |
| ENSG00000087494 | PTHLH    | 1067.7761 | 51.138 | 51.84  | 46.902 | 47.783 | 45.069 | 44.851 | -0.09443 | 0.08217 | -1.14911 | 0.25051 | 0.42488 |
| ENSG00000196396 | PTPN1    | 2200.1551 | 28.255 | 28.671 | 29.368 | 34.569 | 32.809 | 34.844 | 0.272426 | 0.05342 | 5.09945  | 3.4E-07 | 2.8E-06 |
| ENSG00000163629 | PTPN13   | 1824.6558 | 10.232 | 11.896 | 12.964 | 21.955 | 14.584 | 21.844 | 0.761578 | 0.14016 | 5.43351  | 5.5E-08 | 5E-07   |
| ENSG00000103490 | PYCARD   | 279.00798 | 28.853 | 24.943 | 24.698 | 23.505 | 26.806 | 20.133 | -0.12934 | 0.17797 | -0.72676 | 0.46737 | 0.64671 |
| ENSG00000162521 | RBBP4    | 1743.1594 | 72.209 | 74.857 | 70.542 | 67.584 | 73.702 | 68.99  | -0.02375 | 0.07079 | -0.33541 | 0.73731 | 0.85182 |
| ENSG00000173039 | RELA     | 2890.6013 | 66.049 | 65.228 | 65.713 | 67.97  | 65.003 | 67.744 | 0.054909 | 0.05768 | 0.95193  | 0.34113 | 0.52604 |
| ENSG00000104856 | RELB     | 27.911318 | 0.1245 | 0.3942 | 0.7984 | 1.6776 | 1.6315 | 0.4058 | 1.420886 | 0.76543 | 1.85633  | 0.06341 | 0.15007 |
| ENSG00000009413 | REV3L    | 913.40337 | 8.7909 | 11.444 | 11.445 | 9.6757 | 9.9735 | 9.3788 | -0.09976 | 0.10646 | -0.93703 | 0.34874 | 0.53364 |
| ENSG00000104312 | RIPK2    | 1152.8854 | 36.014 | 32.927 | 37.337 | 37.962 | 42.001 | 40.96  | 0.214021 | 0.09707 | 2.20476  | 0.02747 | 0.07566 |
| ENSG00000196154 | S100A4   | 1633.1426 | 343.8  | 351.59 | 374.32 | 308.63 | 312.21 | 306.42 | -0.1791  | 0.0592  | -3.02567 | 0.00248 | 0.00967 |
| ENSG00000197956 | S100A6   | 22003.078 | 3142.1 | 3014.1 | 3143   | 3053.8 | 2899.7 | 2941.6 | -0.03711 | 0.05091 | -0.7288  | 0.46612 | 0.64529 |
| ENSG00000130066 | SAT1     | 4729.4465 | 479.56 | 504.55 | 507.56 | 276.77 | 294.9  | 292.71 | -0.76071 | 0.04816 | -15.7958 | 3.3E-56 | 3E-54   |
| ENSG00000196136 | SERPINA3 | 39.249156 | 0.9481 | 0.9694 | 1.209  | 1.9643 | 1.4221 | 2.1003 | 0.837444 | 0.35743 | 2.34299  | 0.01913 | 0.05584 |
| ENSG00000021355 | SERPINB1 | 525.63697 | 13.983 | 13.503 | 11.692 | 20.898 | 20.3   | 19.758 | 0.666752 | 0.14244 | 4.68104  | 2.9E-06 | 2.1E-05 |
| ENSG00000106366 | SERPINE1 | 76776.767 | 1138.8 | 1174.3 | 1141   | 1324.6 | 1323.2 | 1314.1 | 0.224966 | 0.0261  | 8.61916  | 6.7E-18 | 1.4E-16 |
| ENSG00000135919 | SERPINE2 | 25381.532 | 733.03 | 777.05 | 770.32 | 723.06 | 753.9  | 703.96 | -0.03719 | 0.03848 | -0.96653 | 0.33378 | 0.51817 |
| ENSG00000145604 | SKP2     | 79.827006 | 3.1498 | 3.8709 | 4.1096 | 3.7628 | 3.0636 | 3.6926 | -0.05011 | 0.25476 | -0.19671 | 0.84405 | 0.91788 |
| ENSG00000110911 | SLC11A2  | 704.20877 | 16.575 | 15.058 | 17.806 | 14.359 | 14.083 | 13.535 | -0.20605 | 0.09066 | -2.27276 | 0.02304 | 0.06509 |
| ENSG00000155380 | SLC16A1  | 3192.1825 | 43.21  | 42.223 | 43.355 | 60.555 | 69.755 | 58.286 | 0.576617 | 0.07217 | 7.99017  | 1.3E-15 | 2.4E-14 |
| ENSG00000168003 | SLC3A2   | 1388.0107 | 111.18 | 78.389 | 71.92  | 128.78 | 116.42 | 95.69  | 0.407676 | 0.17442 | 2.33726  | 0.01943 | 0.05648 |
| ENSG00000124216 | SNAI1    | 2103.8371 | 48.668 | 52.864 | 46.128 | 70.1   | 69.191 | 70.39  | 0.5316   | 0.06261 | 8.49101  | 2E-17   | 4.2E-16 |
| ENSG00000111728 | ST8SIA1  | 19.50298  | 0.0603 | 0.0636 | 0.0565 | 0.981  | 0.4311 | 0.6483 | 3.515235 | 0.5728  | 6.1369   | 8.4E-10 | 9.3E-09 |
| ENSG00000126561 | STAT5A   | 143.58417 | 2.2019 | 1.7922 | 2.9124 | 2.3616 | 2.7105 | 3.2676 | 0.313205 | 0.23131 | 1.35403  | 0.17573 | 0.32863 |
| ENSG00000156502 | SUPV3L1  | 461.39334 | 15.053 | 13.568 | 11.869 | 13.928 | 12.948 | 17.668 | 0.164012 | 0.15078 | 1.08778  | 0.27669 | 0.45473 |
| ENSG00000168394 | TAP1     | 5.9353157 | 11.101 | 11.698 | 12.49  | 117.23 | 97.559 | 87.121 | 2.032563 | 3.53946 | 0.57426  | 0.56579 | 0.7278  |
| ENSG00000236490 | TAPBP    | 2213.2794 | 25.253 | 26.625 | 25.766 | 38.539 | 39.419 | 40.978 | 0.641802 | 0.05646 | 11.3673  | 6.1E-30 | 2.3E-28 |
| ENSG00000105967 | TFEC     | 1.1831527 | 0.0171 | 0.0343 | 0      | 0      | 0.0139 | 0.1272 | 0.584369 | 2.47675 | 0.23594  | 0.81348 | NA      |
| ENSG00000137801 | THBS1    | 2387.5689 | 21.849 | 20.801 | 22.955 | 14.158 | 12.308 | 14.223 | -0.66024 | 0.07425 | -8.8922  | 6E-19   | 1.4E-17 |

|                 |          |           |        |        |        |        |        |        |          |         |          |         |         |
|-----------------|----------|-----------|--------|--------|--------|--------|--------|--------|----------|---------|----------|---------|---------|
| ENSG00000186340 | THBS2    | 18913.236 | 185.44 | 194.04 | 193.86 | 178.38 | 176.8  | 171.25 | -0.09596 | 0.04102 | -2.33958 | 0.01931 | 0.05624 |
| ENSG00000041982 | TNC      | 9668.7766 | 45.114 | 48.507 | 49.512 | 75.01  | 65.389 | 67.551 | 0.566356 | 0.0545  | 10.3926  | 2.7E-25 | 8.4E-24 |
| ENSG00000230108 | TNF      | 0.1174592 | 0      | 0      | 0.0529 | 0      | 0      | 0      | -1.19589 | 4.08046 | -0.29308 | 0.76946 | NA      |
| ENSG00000185215 | TNFAIP2  | 1630.671  | 15.918 | 15.833 | 16.452 | 46.771 | 41.543 | 45.512 | 1.501514 | 0.07308 | 20.5452  | 8.5E-94 | 1.9E-91 |
| ENSG00000118503 | TNFAIP3  | 780.13524 | 9.9744 | 9.174  | 9.5546 | 12.323 | 12.576 | 11.313 | 0.364229 | 0.13774 | 2.64431  | 0.00819 | 0.02727 |
| ENSG00000121858 | TNFSF10  | 98.097633 | 0.0912 | 0.154  | 0.2104 | 11.053 | 9.0975 | 7.6322 | 5.945945 | 0.516   | 11.523   | 1E-30   | 3.9E-29 |
| ENSG00000102524 | TNFSF13B | 161.63355 | 2.2304 | 2.2335 | 4.3657 | 12.834 | 10.814 | 9.8561 | 1.979165 | 0.3022  | 6.54928  | 5.8E-11 | 7.3E-10 |
| ENSG00000181634 | TNFSF15  | 17.244827 | 0.1519 | 0.1759 | 0.0919 | 0.1795 | 0.1117 | 0.1548 | 0.128663 | 0.51465 | 0.25     | 0.80258 | 0.89265 |
| ENSG00000050730 | TNIP3    | 4.9503539 | 0.1326 | 0.0879 | 0      | 0.0571 | 0.6286 | 0.4129 | 2.167276 | 1.20908 | 1.7925   | 0.07305 | 0.16759 |
| ENSG00000141510 | TP53     | 1103.8967 | 41.184 | 35.623 | 36.381 | 36.54  | 33.299 | 32.753 | -0.11228 | 0.10309 | -1.08911 | 0.27611 | 0.45436 |
| ENSG00000056558 | TRAF1    | 282.18951 | 3.5293 | 3.3806 | 3.4694 | 2.6933 | 2.3945 | 2.804  | -0.36389 | 0.13358 | -2.72416 | 0.00645 | 0.02219 |
| ENSG00000124731 | TREM1    | 116.39879 | 4.0237 | 4.503  | 4.5356 | 8.9645 | 9.2272 | 9.8145 | 1.127159 | 0.20722 | 5.43953  | 5.3E-08 | 4.9E-07 |
| ENSG00000130725 | UBE2M    | 3768.6848 | 153.46 | 151.02 | 149.56 | 166.12 | 163.51 | 152.2  | 0.112906 | 0.05463 | 2.06684  | 0.03875 | 0.10079 |
| ENSG00000162692 | VCAM1    | 75.612291 | 0.8692 | 1.0769 | 1.452  | 2.9802 | 2.416  | 2.5377 | 1.247872 | 0.29899 | 4.17366  | 3E-05   | 0.00018 |
| ENSG00000150630 | VEGFC    | 3643.5074 | 88.184 | 94.471 | 91.422 | 110.06 | 106.52 | 100.52 | 0.237237 | 0.05621 | 4.22037  | 2.4E-05 | 0.00015 |
| ENSG00000026025 | VIM      | 180887.09 | 6599.8 | 6676.2 | 6760.5 | 5062.2 | 5357.7 | 5274.3 | -0.32509 | 0.05331 | -6.09782 | 1.1E-09 | 1.2E-08 |
| ENSG00000100811 | YY1      | 2558.363  | 31.687 | 33.077 | 30.224 | 34.97  | 33.076 | 36.056 | 0.158983 | 0.06172 | 2.57601  | 0.00999 | 0.03235 |

**Supplemental Table VI: GSEA report for RNA-seq data on HASMCs infected with AdBAF60a vs. AdGFP**

**Online Table VIa: Gene sets enriched in HASMCs infected with AdGFP**

| Name                               | Size | ES      | NES     | NOM <i>p</i> -val | FDR <i>q</i> -val | FWER <i>p</i> -val | Rank at Max | Leading Edge                   |
|------------------------------------|------|---------|---------|-------------------|-------------------|--------------------|-------------|--------------------------------|
| Hallmark_Mitotic Spindle           | 198  | -0.6706 | -1.2981 | 0                 | 0.4006            | 0.154              | 3548        | tags=44%, list=10%, signal=49% |
| Hallmark_Spermatogenesis           | 133  | -0.4845 | -1.2796 | 0                 | 0.2452            | 0.207              | 3545        | tags=29%, list=10%, signal=32% |
| Hallmark_DNA Repair                | 149  | -0.5793 | -1.2277 | 0                 | 0.2533            | 0.505              | 6249        | tags=52%, list=17%, signal=63% |
| Hallmark_Myc Targets V2            | 58   | -0.6258 | -1.2114 | 0                 | 0.2097            | 0.505              | 6699        | tags=60%, list=19%, signal=74% |
| Hallmark_G2M Checkpoint            | 195  | -0.8044 | -1.1819 | 0                 | 0.2157            | 0.698              | 2560        | tags=64%, list=7%, signal=69%  |
| Hallmark_Myc Targets V1            | 196  | -0.6955 | -1.1679 | 0                 | 0.1978            | 0.698              | 6631        | tags=66%, list=18%, signal=80% |
| Hallmark_E2f Targets               | 198  | -0.8602 | -1.1590 | 0                 | 0.1838            | 0.742              | 2556        | tags=75%, list=7%, signal=80%  |
| Hallmark_TGFβ Signaling            | 53   | -0.3933 | -1.0874 | 0.1882            | 0.2495            | 0.888              | 4658        | tags=38%, list=13%, signal=43% |
| Hallmark_Oxidative Phosphorylation | 200  | -0.3595 | -1.0841 | 0.1008            | 0.2338            | 0.888              | 8200        | tags=54%, list=23%, signal=69% |
| Hallmark_Protein Secretion         | 96   | -0.3105 | -0.9882 | 0.4187            | 0.4640            | 1                  | 7399        | tags=36%, list=21%, signal=46% |

**Online Table VIb: Gene sets enriched in HASMCs infected with AdBAF60a**

| Name                               | Size | ES     | NES    | NOM <i>p</i> -val | FDR <i>q</i> -val | FWER <i>p</i> -val | Rank at Max | Leading Edge                   |
|------------------------------------|------|--------|--------|-------------------|-------------------|--------------------|-------------|--------------------------------|
| Hallmark_Notch Signaling           | 32   | 0.5978 | 1.5103 | 0                 | 0.0530            | 0                  | 2200        | tags=25%, list=6%, signal=27%  |
| Hallmark_PI3K/AKT/mTOR Signaling   | 105  | 0.4362 | 1.4290 | 0                 | 0.0530            | 0.053              | 4600        | tags=26%, list=13%, signal=29% |
| Hallmark_KRAS Signaling Down       | 198  | 0.5904 | 1.4012 | 0                 | 0.0530            | 0.053              | 3487        | tags=27%, list=10%, signal=29% |
| Hallmark_Unfolded Protein Response | 110  | 0.5102 | 1.3920 | 0                 | 0.0530            | 0.053              | 3413        | tags=29%, list=10%, signal=32% |
| Hallmark_Fatty Acid Metabolism     | 156  | 0.4672 | 1.3874 | 0                 | 0.0530            | 0.053              | 5655        | tags=31%, list=16%, signal=36% |
| Hallmark_IL2/STAT5 Signaling       | 199  | 0.5297 | 1.3862 | 0                 | 0.0530            | 0.053              | 3511        | tags=32%, list=10%, signal=35% |
| Hallmark_Allograft Rejection       | 195  | 0.5609 | 1.3741 | 0                 | 0.0530            | 0.053              | 4327        | tags=27%, list=12%, signal=31% |
| Hallmark_Interferon Gamma Response | 197  | 0.8059 | 1.3657 | 0                 | 0.0677            | 0.097              | 2065        | tags=50%, list=6%, signal=53%  |
| Hallmark_Inflammatory Response     | 200  | 0.6097 | 1.3619 | 0                 | 0.0660            | 0.097              | 3510        | tags=32%, list=10%, signal=35% |
| Hallmark_P53 Pathway               | 195  | 0.6065 | 1.3609 | 0                 | 0.0647            | 0.097              | 4092        | tags=38%, list=11%, signal=43% |
| Hallmark_Apical Junction           | 200  | 0.4738 | 1.3596 | 0                 | 0.0637            | 0.097              | 5719        | tags=36%, list=16%, signal=43% |
| Hallmark_Myogenesis                | 198  | 0.6840 | 1.3567 | 0                 | 0.0628            | 0.097              | 3969        | tags=40%, list=11%, signal=45% |
| Hallmark_UV Response Up            | 156  | 0.6337 | 1.3545 | 0                 | 0.0620            | 0.097              | 4787        | tags=44%, list=13%, signal=51% |
| Hallmark_Complement                | 200  | 0.5773 | 1.3429 | 0                 | 0.0614            | 0.097              | 5800        | tags=40%, list=16%, signal=47% |
| Hallmark_Cholesterol Homeostasis   | 73   | 0.5106 | 1.3429 | 0                 | 0.0608            | 0.097              | 3904        | tags=33%, list=11%, signal=37% |

|                                                   |     |        |        |        |        |       |      |                                |
|---------------------------------------------------|-----|--------|--------|--------|--------|-------|------|--------------------------------|
| Hallmark_TNF $\alpha$ Signaling via NF $\kappa$ B | 199 | 0.6520 | 1.3411 | 0      | 0.0603 | 0.097 | 2791 | tags=41%, list=8%, signal=44%  |
| Hallmark_KRAS Signaling Up                        | 199 | 0.5227 | 1.3330 | 0      | 0.0599 | 0.097 | 5515 | tags=38%, list=15%, signal=45% |
| Hallmark_IL6/JAK/STAT3 Signaling                  | 86  | 0.6382 | 1.3328 | 0      | 0.0595 | 0.097 | 3700 | tags=38%, list=10%, signal=43% |
| Hallmark_Reactive Oxygen Species Pathway          | 48  | 0.4444 | 1.3255 | 0      | 0.0592 | 0.097 | 6672 | tags=33%, list=19%, signal=41% |
| Hallmark_Apoptosis                                | 160 | 0.6086 | 1.3207 | 0      | 0.0589 | 0.097 | 4313 | tags=46%, list=12%, signal=52% |
| Hallmark_Angiogenesis                             | 36  | 0.6169 | 1.3122 | 0      | 0.0586 | 0.097 | 2022 | tags=31%, list=6%, signal=32%  |
| Hallmark_Adipogenesis                             | 198 | 0.4555 | 1.3075 | 0      | 0.0614 | 0.152 | 6336 | tags=36%, list=18%, signal=44% |
| Hallmark_Xenobiotic Metabolism                    | 198 | 0.5680 | 1.3043 | 0      | 0.0610 | 0.152 | 4978 | tags=38%, list=14%, signal=44% |
| Hallmark_Estrogen Response Early                  | 199 | 0.4911 | 1.2997 | 0      | 0.0607 | 0.152 | 2063 | tags=24%, list=6%, signal=25%  |
| Hallmark_Coagulation                              | 138 | 0.5916 | 1.2976 | 0      | 0.0604 | 0.152 | 4691 | tags=39%, list=13%, signal=45% |
| Hallmark_Hedgehog Signaling                       | 36  | 0.5052 | 1.2923 | 0      | 0.0601 | 0.152 | 1556 | tags=22%, list=4%, signal=23%  |
| Hallmark_Glycolysis                               | 197 | 0.4757 | 1.2834 | 0      | 0.0671 | 0.201 | 3888 | tags=30%, list=11%, signal=34% |
| Hallmark_Hypoxia                                  | 200 | 0.5531 | 1.2686 | 0      | 0.0771 | 0.295 | 4827 | tags=45%, list=13%, signal=52% |
| Hallmark_Apical Surface                           | 44  | 0.5068 | 1.2648 | 0      | 0.0762 | 0.295 | 2484 | tags=27%, list=7%, signal=29%  |
| Hallmark_Estrogen Response Late                   | 199 | 0.5123 | 1.2568 | 0      | 0.0809 | 0.387 | 3791 | tags=33%, list=11%, signal=37% |
| Hallmark_Heme Metabolism                          | 193 | 0.4080 | 1.2419 | 0      | 0.0881 | 0.491 | 4410 | tags=26%, list=12%, signal=29% |
| Hallmark_Epithelial Mesenchymal Transition        | 199 | 0.4770 | 1.2403 | 0.0949 | 0.0870 | 0.491 | 5331 | tags=39%, list=15%, signal=46% |
| Hallmark_mTORC1 Signaling                         | 196 | 0.5043 | 1.2355 | 0      | 0.0859 | 0.491 | 4560 | tags=36%, list=13%, signal=41% |
| Hallmark_Wnt/ $\beta$ -catenin Signaling          | 42  | 0.4722 | 1.2160 | 0.1052 | 0.0923 | 0.491 | 3441 | tags=24%, list=10%, signal=26% |
| Hallmark_Interferon Alpha Response                | 96  | 0.9028 | 1.2136 | 0      | 0.0968 | 0.491 | 2247 | tags=77%, list=6%, signal=82%  |
| Hallmark_Bile Acid Metabolism                     | 112 | 0.3978 | 1.1853 | 0      | 0.1094 | 0.706 | 7329 | tags=41%, list=20%, signal=51% |
| Hallmark_UV Response DN                           | 143 | 0.3665 | 1.0733 | 0.2343 | 0.2503 | 0.909 | 4991 | tags=27%, list=14%, signal=32% |
| Hallmark_Androgen Response                        | 98  | 0.3276 | 0.9741 | 0.4019 | 0.5519 | 1     | 5096 | tags=30%, list=14%, signal=34% |
| Hallmark_Peroxisome                               | 104 | 0.3124 | 0.9687 | 0.3866 | 0.5575 | 1     | 6884 | tags=35%, list=19%, signal=43% |
| Hallmark_Pancreas Beta Cells                      | 40  | 0.3794 | 0.9657 | 0.3855 | 0.5519 | 1     | 7406 | tags=33%, list=21%, signal=41% |

**Supplemental Table VII: Gene expression profile of differentially expressed cathepsins from BAF60a knockdown or overexpressing HASMCs**

**Supplemental Table VIIa: Gene expression profile of differentially expressed cathepsins from BAF60a knockdown HASMCs**

| gene_ensembl_id | gene_name | baseMean | TPM_siControl_1 | TPM_siControl_2 | TPM_siControl_3 | TPM_siBAF60a_1 | TPM_siBAF60a_2 | TPM_siBAF60a_3 | log2FoldChange | lfcSE   | stat    | p value   | p adj    |
|-----------------|-----------|----------|-----------------|-----------------|-----------------|----------------|----------------|----------------|----------------|---------|---------|-----------|----------|
| ENSG00000256043 | CTSO      | 2802.61  | 28.981          | 30.6715         | 26.8006         | 3.87282        | 4.37445        | 4.49655        | -2.8012        | 0.08597 | -32.585 | 6.72E-233 | 5.1E-229 |
| ENSG00000163131 | CTSS      | 1359.87  | 178.545         | 184.721         | 155.547         | 74.7809        | 101.422        | 95.109         | -1.0797        | 0.10796 | -10.001 | 1.511E-23 | 2.5E-21  |
| ENSG00000109861 | CTSC      | 8504.95  | 241.658         | 261.658         | 251.688         | 161.788        | 158.171        | 161.071        | -0.7508        | 0.05207 | -14.419 | 3.936E-47 | 2.99E-44 |
| ENSG00000135047 | CTSL      | 5415.16  | 350.564         | 381.74          | 321.974         | 234.349        | 308.819        | 271.153        | -0.4251        | 0.09976 | -4.261  | 2.036E-05 | 0.000273 |

Differentially expressed genes are defined as >1.3-fold change in expression level, false discovery rate (FDR) <0.05 and adjusted p value <0.05.

**Supplemental Table VIIb: Gene expression profile of differentially expressed cathepsins from BAF60a overexpressing HASMCs**

| gene_ensembl_id | gene_name | baseMean | TPM_AdGFP_1 | TPM_AdGFP_2 | TPM_AdGFP_3 | TPM_AdBAF60a_1 | TPM_AdBAF60a_2 | TPM_AdBAF60a_3 | log2FoldChange | lfcSE   | stat    | p value   | p adj    |
|-----------------|-----------|----------|-------------|-------------|-------------|----------------|----------------|----------------|----------------|---------|---------|-----------|----------|
| ENSG00000163131 | CTSS      | 86.4095  | 2.24835     | 2.58374     | 0.93908     | 5.63182        | 4.83678        | 4.49993        | 1.42994        | 0.36606 | 3.90629 | 9.373E-05 | 0.000514 |
| ENSG00000143387 | CTSK      | 2182.48  | 71.52       | 79.884      | 77.9657     | 101.218        | 96.5673        | 99.332         | 0.39991        | 0.06137 | 6.516   | 7.221E-11 | 9.02E-10 |
| ENSG00000117984 | CTSD      | 15882.9  | 349.85      | 350.883     | 352.36      | 434.033        | 466.691        | 446.442        | 0.38239        | 0.04907 | 7.79205 | 6.593E-15 | 1.15E-13 |
| ENSG00000109861 | CTSC      | 6103.42  | 299.753     | 302.66      | 324.214     | 223.055        | 229.416        | 232.399        | -0.409         | 0.04472 | -9.1454 | 5.942E-20 | 1.43E-18 |

Differentially expressed genes are defined as >1.3-fold change in expression level, false discovery rate (FDR) <0.05 and adjusted p value <0.05.



**Supplemental Table VIII. Sequences of the primers used for real-time PCR**

| Name                    | Forward primer Sequence | Reverse primer Sequence  |
|-------------------------|-------------------------|--------------------------|
| human <i>BAF60a</i>     | TCAGTCCCGCAAGAGACCT     | CCAGTTCACGAATCCTTTGAGG   |
| mouse <i>Baf60a</i>     | GGCGGTCCAAAATCGAAATC    | ACCAGTTCCCGAATCCTTTG     |
| human <i>CTSS</i>       | GCAGTGGCACAGTTGCATAA    | AGCACCACAAGAACCCATGT     |
| mouse <i>Ctss</i>       | CCATTGGGATCTCTGGAAGAAAA | TCATGCCCACTTGGTAGGTAT    |
| mouse <i>Mmp2</i>       | TGGGGGAGATTCTCACTTTG    | CATCACTGCGACCAGTGTCT     |
| mouse <i>Mmp9</i>       | CGTCGTGATCCCCACTTACT    | AACACACAGGGTTTGCCTTC     |
| human <i>CCL2</i>       | CAGCCAGATGCAATCAATGCC   | TGGAATCCTGAACCCACTTCT    |
| human <i>CCL5</i>       | CTGCTTTGCCTACATTGCC     | CTTGTTCAGCCGGGAGTCAT     |
| human <i>CCL7</i>       | AGAAGGACCACCAGTAGCCA    | CCACTTCTGTGTGGGGTCAG     |
| human <i>CCL8</i>       | TCATGCTGAAGCTCACACCC    | GTCCCTGAGGGCTGAAAGTG     |
| human <i>IL6</i>        | ACTCACCTCTTCAGAACGAATTG | CCATCTTTGGAAGGTTTCAGGTTG |
| human <i>IL1A</i>       | TGGTAGTAGCAACCAACGGGA   | ACTTTGATTGAGGGCGTCATTC   |
| human <i>IL1B</i>       | AGCTACGAATCTCCGACCAC    | CGTTATCCCATGTGTCTGAAGAA  |
| human <i>IL8</i>        | TGGACCCCAAGGAAAACCTGG   | TTTGCTTGAAGTTTCACTGGC    |
| human <i>IL33</i>       | AGAACACAGCAAGCAAAGCC    | GGGCAAACCTCTTTGGCCTTC    |
| human <i>CXCL3</i>      | CGCCCAAACCGAAGTCATAG    | GCTCCCCTTGTTTCAGTATCTTTT |
| human <i>CXCL5</i>      | AGCTGCGTTGCGTTTGTTTAC   | TGGCGAACACTTGCAGATTAC    |
| human <i>CXCL11</i>     | GACGCTGTCTTTGCATAGGC    | GGATTTAGGCATCGTTGTCCTTT  |
| human <i>VCAM1</i>      | CGAACCCAAACAAAGGCAGA    | ACAGGATTTTCGGAGCAGGA     |
| human <i>HMOX1</i>      | CGTTCCTGCTCAACATCCAG    | TGAGTGTAAGGACCCATCGG     |
| human <i>IRF4</i>       | AGCATAAGGTCTGCCGAAGC    | CTCTGGGTAGGGGAACAGGA     |
| human <i>TNF</i>        | CCTCTCTCTAATCAGCCCTCTG  | GAGGACCTGGGAGTAGATGAG    |
| human <i>ACTB</i>       | GTCATTCCAAATATGAGATGCGT | GCTATCACCTCCCCTGTGTG     |
| mouse <i>Actb</i>       | GGCTGTATTCCCCTCCATCG    | CCAGTTGGTAACAATGCCATGT   |
| human <i>CTSS</i> ChIP  | CAAAGCACGACTCCGTCTCG    | ATGAGGTTGAGGATCTTTTCACAC |
| mouse <i>Ccl2</i> ChIP  | TCCAACCCACAGTTTCTCTC    | GAATCCGCTGAGTAAGTGCA     |
| mouse <i>Cxcl6</i> ChIP | TTCTTTCCACACTGCCCCCT    | TGCATTTCATCCCCTCCCGACT   |
| mouse <i>Il1b</i> ChIP  | CAGGAATGGAGGGCTATCT     | GCTTGAACCTCTGATAGCCAC    |
| mouse <i>Ctss</i> ChIP  | CTGGGAAATGGGAGCATAAATG  | AGGTGAGGAACTCCTGTTTC     |

## Major Resources Table

### Animals (in vivo studies)

| Species                                                                    | Vendor or Source                                                                         | Background Strain | Sex             | Persistent ID / URL                                       |
|----------------------------------------------------------------------------|------------------------------------------------------------------------------------------|-------------------|-----------------|-----------------------------------------------------------|
| C57BL/6J mice                                                              | Jackson Laboratory                                                                       | C57BL/6           | Male            | <a href="#">000664 - C57BL/6J</a>                         |
| BAF60a <sup>ff</sup> mice                                                  | Dr. Jiandie Lin at the University of Michigan                                            | C57BL/6           | Male and female |                                                           |
| SMMHC-CreER <sup>T2</sup> mice                                             | Jackson Laboratory                                                                       | C57BL/6           | Male            | <a href="#">019079 - B6.FVB-Tg(Myh11-cre/ERT2)1Soff/J</a> |
| Smooth muscle cell specific BAF60a knockout (BAF60a <sup>SMKO</sup> ) mice | Generated by crossbreeding BAF60a <sup>ff</sup> mice with SMMHC-CreER <sup>T2</sup> mice | C57BL/6           | Male            |                                                           |

### Antibodies

| Target antigen | Vendor or Source | Catalog #  | Working concentration                                         | Lot # (preferred but not required) | Persistent ID / URL                               |
|----------------|------------------|------------|---------------------------------------------------------------|------------------------------------|---------------------------------------------------|
| BAF60a         | BD Biosciences   | 611728     | 0.25µg/mL for Western blot                                    | 7271976                            | <a href="#">BAF60a-BD Biosciences-611728</a>      |
| BAF60a         | Abcam            | ab245222   | 0.497 µg/mL for Western blot<br>4.97 µg/mL for immunostaining | GR3314163-2                        | <a href="#">smarcd1-abcam-ab245222</a>            |
| BRG1           | Abcam            | ab110641   | 0.2 µg/mL for Western blot<br>4 µg/mL for Chromatin IP        | GR3208604-17                       | <a href="#">BRG1-abcam-ab110641</a>               |
| Cathepsin S    | Abcam            | ab92780    | 1 µg/mL for Western blot                                      | GR78357-1                          | <a href="#">cathepsin S-abcam-ab92780</a>         |
| SM22α          | Abcam            | ab10135    | 2.5 µg/mL for immunostaining                                  | GR224121-4                         | <a href="#">TAGLN-abcam-ab10135</a>               |
| Mac2           | eBioscience      | 14-5301-82 | 3.3 µg/mL for immunostaining                                  |                                    | <a href="#">Galectin-3-eBioscience-14-5301-82</a> |
| MMP2           | ABclonal         | A11144     | 8.9 µg/mL for immunostaining                                  | 0207280101                         | <a href="#">MMP2-ABclonal-A11144</a>              |
| MMP9           | ABclonal         | A2095      | 8 µg/mL for immunostaining                                    | 11151690301                        | <a href="#">MMP9-ABclonal-A2095</a>               |

|                                                                                |                           |             |                                                                                       |        |                                                   |
|--------------------------------------------------------------------------------|---------------------------|-------------|---------------------------------------------------------------------------------------|--------|---------------------------------------------------|
| BAF155                                                                         | Cell Signaling Technology | 11956       | 0.4 µg/mL for Western blot                                                            | 2      | <a href="#">BAF155-CST-11956</a>                  |
| BAF170                                                                         | Cell Signaling Technology | 12760       | 0.4 µg/mL for Western blot                                                            | 1      | <a href="#">BAF170-CST-12760</a>                  |
| BAF47                                                                          | Cell Signaling Technology | 91735       | 0.4 µg/mL for Western blot                                                            | 1      | <a href="#">BAF47-CST-91735</a>                   |
| p65                                                                            | Cell Signaling Technology | 8242        | 0.2 µg/mL for Western blot;<br>2 µg/mL for immunostaining<br>4 µg/mL for Chromatin IP | 9      | <a href="#">nf-kb-p65-CST-8242</a>                |
| p-p65                                                                          | Cell Signaling Technology | 3033        | 0.2 µg/mL for Western blot                                                            | 16     | <a href="#">phospho-nf-kb-p65-ser536-CST-3033</a> |
| p-IKKα/β                                                                       | Cell Signaling Technology | 2697        | 0.4 µg/mL for Western blot                                                            | 19     | <a href="#">phospho-ikkb-ser176-180-CST-2697</a>  |
| p300                                                                           | Cell Signaling Technology | 54062       | 0.4 µg/mL for Western blot<br>4 µg/mL for co-IP                                       |        | <a href="#">p300-d2x6n-CST-54062</a>              |
| p300                                                                           | Cell Signaling Technology | 70088       | 0.4 µg/mL for Western blot<br>4 µg/mL for co-IP                                       | 1      | <a href="#">p300-d1m7c-CST-70088</a>              |
| lamin A/C                                                                      | Cell Signaling Technology | 2032        | 0.4 µg/mL for Western blot                                                            | 4      | <a href="#">lamin-a-c-CST-2032</a>                |
| β-actin                                                                        | Cell Signaling Technology | 3700        | 0.01 µg/mL for Western blot                                                           | 17     | <a href="#">b-actin-CST-3700</a>                  |
| GAPDH                                                                          | Santa Cruz Biotechnology  | sc-365062   | 0.1 µg/mL for Western blot                                                            | G2618  | <a href="#">scbt-GAPDH-G-9</a>                    |
| Alexa Fluor® 680 AffiniPure Goat Anti-Mouse IgG, light chain specific antibody | Jackson ImmunoResearch    | 115-625-174 | 0.075 µg/mL for Western blot                                                          | 138707 | <a href="#">jacksonimmuno-115-625-174</a>         |
| Alexa Fluor® 488 Streptavidin Conjugate antibody                               | Jackson ImmunoResearch    | 016-540-084 | 1 µg/mL for immunostaining                                                            | 138322 | <a href="#">jacksonimmuno-016-540-084</a>         |
| Alexa Fluor® 488-AffiniPure Donkey Anti-Mouse IgG (H+L)                        | Jackson ImmunoResearch    | 715-545-151 | 1 µg/mL for immunostaining                                                            | 125268 | <a href="#">jacksonimmuno-715-545-151</a>         |

|                                                          |                        |             |                                |        |                                                       |
|----------------------------------------------------------|------------------------|-------------|--------------------------------|--------|-------------------------------------------------------|
| Alexa Fluor® 647 AffiniPure Donkey Anti-Rat IgG (H+L)    | Jackson ImmunoResearch | 712-605-153 | 1 µg/mL for immunostaining     | 123725 | <a href="#">jacksonimmuno-712-605-153</a>             |
| Alexa Fluor® 488-AffiniPure Donkey Anti-Rabbit IgG (H+L) | Jackson ImmunoResearch | 711-545-152 | 1 µg/mL for immunostaining     | 139168 | <a href="#">jacksonimmuno-711-545-152</a>             |
| CD16/CD32                                                | eBioscience            | 14-0161-85  | 0.5 µg/test for flow cytometry |        | <a href="#">CD16-CD32-14-0161-85</a>                  |
| Rat IgG2b kappa Isotype Control, PE                      | eBioscience            | 12-4031-82  | 0.2 µg/test for flow cytometry |        | <a href="#">Rat-IgG2b-kappa-PE-12-4031-82</a>         |
| Rat IgG2b kappa Isotype Control, eFluor 450              | eBioscience            | 48-4031-82  | 0.2 µg/test for flow cytometry |        | <a href="#">Rat-IgG2b-kappa-eFluor 450-48-4031-82</a> |
| Rat IgG2b kappa Isotype Control, APC                     | eBioscience            | 17-4321-81  | 0.2 µg/test for flow cytometry |        | <a href="#">Rat-IgG2b-kappa-APC-17-4321-81</a>        |
| CD45, eFluor 450                                         | eBioscience            | 48-0451-82  | 0.2 µg/test for flow cytometry |        | <a href="#">CD45-eFluor 450-48-0451-82</a>            |
| F4/80, APC                                               | eBioscience            | 17-4801-82  | 0.2 µg/test for flow cytometry |        | <a href="#">F4-80-APC-17-4801-82</a>                  |
| CD11b, PE                                                | Tonbo Biosciences      | 50-0112     | 0.2 µg/test for flow cytometry |        | <a href="#">CD11b-PE-50-0112</a>                      |

5

### Cultured Cells

| Name                             | Vendor or Source | Sex (F, M, or unknown) | Persistent ID / URL                  |
|----------------------------------|------------------|------------------------|--------------------------------------|
| Human aortic smooth muscle cells | Lonza            | M                      | <a href="#">AoSMC-Lonza-CC2571</a>   |
| A7r5 cells                       | ATCC             | unknown                | <a href="#">A7r5-atcc-CRL-1444</a>   |
| RAW 264.7                        | ATCC             | unknown                | <a href="#">RAW264.7-atcc-TIB-71</a> |
| EcoPack2-293 cells               | Takara           | unknown                | <a href="#">EcoPack2-293 cells</a>   |
